1 **Differences in the structure of plant polygalacturonases specify enzymes'**  
2 **dynamics and processivities to fine-tune pectins and root development**

3 Josip Safran<sup>1#</sup>, Wafae Tabi<sup>1#</sup>, Vanessa Ung<sup>2#</sup>, Adrien Lemaire<sup>1</sup>, Olivier Habrylo<sup>1</sup>, Julie  
4 Bouckaert<sup>3</sup>, Maxime Rouffle<sup>1</sup>, Aline Voxeur<sup>4</sup>, Paula Pongrac<sup>1</sup>, Solène Bassard<sup>1</sup>, Roland  
5 Molinié<sup>1</sup>, Jean-Xavier Fontaine<sup>1</sup>, Serge Pilard<sup>5</sup>, Corinne Pau-Roblot<sup>1</sup>, Estelle Bonnin<sup>6</sup>, Danaé  
6 Sonja Larsen<sup>2</sup>, Mélanie Morel-Rouhier<sup>7</sup>, Jean-Michel Girardet<sup>7</sup>, Valérie Lefebvre<sup>1</sup>, Fabien  
7 Sénéchal<sup>1§</sup>, Davide Mercadante<sup>2§</sup>, Jérôme Pelloux<sup>1§</sup>

8 <sup>1</sup>UMRT INRAE 1158 BioEcoAgro – BIOPI Biologie des Plantes et Innovation, Université de  
9 Picardie, 33 Rue St Leu, 80039 Amiens, France. <sup>2</sup>School of Chemical Sciences, The University  
10 of Auckland, Private Bag 92019, Auckland 1142, New Zealand. <sup>3</sup>UMR 8576 Unité de  
11 Glycobiologie Structurale et Fonctionnelle (UGSF), 50 Avenue de Halley, 59658 Villeneuve  
12 d'Ascq, France. <sup>4</sup>Université Paris-Saclay, INRAE, AgroParisTech, Institut Jean-Pierre Bourgin  
13 (IJPB), 78000, Versailles, France <sup>5</sup>Plateforme Analytique, Université de Picardie, 33, Rue St  
14 Leu, 80039 Amiens, France. <sup>6</sup>INRAE, UR 1268 Biopolymers, Interactions Assemblies, CS  
15 71627, 44316 Nantes Cedex 3, France. <sup>7</sup>Université de Lorraine, INRAE, IAM, F-54000 Nancy,  
16 France.

17 #: Contributed equally as first authors

18 §: Contributed equally as last authors

19

20 **Corresponding authors:**

21 Jérôme Pelloux ([jerome.pelloux@u-picardie.fr](mailto:jerome.pelloux@u-picardie.fr))

22 Davide Mercadante ([davide.mercadante@auckland.ac.nz](mailto:davide.mercadante@auckland.ac.nz))

23 Fabien Sénéchal ([fabien.senechal@u-picardie.fr](mailto:fabien.senechal@u-picardie.fr))

24

25

26

## 27 **Abstract**

28 The fine-tuning of pectins by polygalacturonases (PGs) plays a key role in modulating plant  
29 cell wall chemistry and mechanics, impacting plant development. The high number of plant PG  
30 isoforms and their absence of inhibition by endogenous PG-Inhibiting Proteins (PGIPs)  
31 question the regulation of pectin depolymerization during development. Our understanding of  
32 the diversity and of the regulation of plant PGs has been impaired by the lack of protein  
33 structures. Here we resolved the crystal structures of two PGs from Arabidopsis, PGLR and  
34 ADPG2, whose expression overlap in roots and determined why plant PGs are not inhibited by  
35 PGIPs. By combining molecular dynamic simulations, analysis of enzymes' kinetics and  
36 hydrolysis products, we showed that subtle differences in PGLR and ADPG2 structures  
37 translated into distinct dynamics and processivities. This leads to peculiar effects on root  
38 development, as determined by exogenous applications of enzymes.

## 39 Introduction

40 The plant primary cell wall, composed of an intricate network of polysaccharides and  
41 proteins, is constantly remodelled translating in changes in its mechanical properties, which  
42 ultimately affect the extent of cell growth or the response to environmental stress<sup>1</sup>. Pectin, the  
43 major polysaccharide of the primary cell wall of dicotyledonous species such as Arabidopsis,  
44 are composed of homogalacturonan (HG): a homopolymer of  $\alpha$ -1,4-linked-D-galacturonic acid  
45 (GalA) units, that can be substituted with methylester and/or acetyl groups<sup>2</sup>. The control of the  
46 degree of polymerization (DP) of HG by polygalacturonases (PGs) regulates diverse  
47 developmental processes such as root/hypocotyl growth, stomata functioning, cell separation  
48 during pollen formation and pollen tube elongation<sup>3-8</sup>. Importantly, phytopathogenic  
49 organisms, including parasitic plants, also produce PGs, thus contributing to host colonization  
50 by degrading the physical barrier of the plant cell wall<sup>9</sup>. Although all perform the hydrolysis of  
51 the  $\alpha$ -(1-4) glycosidic bond between two adjacent non-methylesterified GalA units, PGs can  
52 differ in their mode of action and are referred to as endo-PGs (EC 3. 2.1.15) or exo-PGs (EC  
53 3.2.1.67) if they either hydrolyze in the middle of the HG chain or attack from the non-reducing  
54 end of it. All resolved structures of PGs from microorganisms fold into a right-handed parallel  
55 beta-helix and harbour four conserved amino acids (aa) stretches in their active site: namely  
56 NTD, DD, GHG and RIK<sup>10</sup>. In a typical endo-PG, such as that from *Aspergillus aculeatus* PG1  
57 (AaPG1), the active site is organized in a tunnel-like binding cleft, allowing the enzyme to bind  
58 the polysaccharide and produce oligogalacturonides (OGs) of various DP and with different  
59 chemistries<sup>11</sup>. In contrast, the structure of exo-PGs differs, loop extension turns the open-ended  
60 channel into a closed pocket, restricting the attack to the non-reducing end of the substrate, and  
61 releasing non-methylesterified GalA monomers or dimers<sup>12</sup>. It has been reported that  
62 pathogenic PGs are inhibited by Polygalaturonase Inhibiting Proteins (PGIPs), expressed by  
63 plants upon infection, either through competitive or non-competitive interactions, in a strategic  
64 attempt by plants to limit pectin degradation and pathogenic invasion<sup>13</sup>. In contrast, plant PGs  
65 are not inhibited by PGIPs, which suggests yet unidentified structural differences among this  
66 class of enzymes. The PG-mediated degradation of HG can have two distinct consequences: i)  
67 it can impact polysaccharide rheology, decreasing cell wall stiffness and promoting cell growth  
68 (or infection by pathogens) and/or ii) it can produce OGs, which can act as signalling  
69 molecules<sup>14,15</sup>. It seems likely that the fine composition of OG arrays produced by a myriad of  
70 differentially expressed PG isoforms can modulate the oligosaccharide interactions with cell  
71 wall integrity receptors, triggering distinct downstream signalling events.

72 In plants, PGs are encoded by large multigenic families (68 genes in *Arabidopsis*  
73 *thaliana*), which questions the rationale for such an abundance in the context of the cell wall.  
74 Considering such a large number of genes, and potential compensation mechanisms mediated  
75 by partial functional redundancy between isoforms, the use of reverse or forward genetic  
76 mutants can only bring partial clues to sample the diversity of the plant PGs' landscape.

77 Here we report on the biochemical and first structural characterization of two plant PGs,  
78 PGLR (PolyGalacturonase Lateral Root) and ADPG2 (Arabidopsis Dehiscence zone  
79 PolyGalacturonase 2), whose expression overlaps in Arabidopsis roots during lateral root  
80 emergence<sup>8,16</sup>. We found that, although having an overall conserved structure and overlapping  
81 functional profiles, enzymes have key and noticeable differences in their mode of action,  
82 resulting in phenotypical differences on root growth. The investigation of PGLR and ADPG2  
83 crystal structures, together with enzyme-substrate complexes, via combined experimental and  
84 computational approaches, including binding kinetics, Molecular Dynamics (MD) simulations,  
85 LC-MS/MS profiling of digestion products highlighted the existence of a direct link between  
86 enzyme-substrate interactions and dynamics, enzyme activities and specificities.

87 Overall, structural and dynamical analyses of PGLR and ADPG2 reported distinct  
88 dynamical behaviours, which led to the production of distinct OG pools. This shows that,  
89 despite apparent gene redundancy, plant PGs have distinct activities and processivities leading  
90 to peculiar consequences on plant development, as determined by the exogenous application of  
91 the enzymes during the early stages of seedlings development.

## 92 **Results**

### 93 **Crystal structures of *A. thaliana* PGLR and ADPG2 reveals conserved $\beta$ -fold**

94 ADPG2 was produced as an active recombinant proteins in the yeast *Pichia pastoris*  
95 and subsequently purified, similarly to PGLR<sup>8</sup>. PGLR and ADPG2 present similar biochemical  
96 characteristics, with an optimal activity at acidic pH, temperatures ranging from 25 to 50 °C  
97 and on pectic substrates with low degree of methylesterification (DM, Extended data Fig. 1 and  
98 ref.<sup>8</sup>). Using PGA as a substrate, at 25°C, PGLR and ADPG2 differ in their  $K_m$  (14.57 versus  
99 3.0 mg.ml<sup>-1</sup>) and  $V_{max}$  (30.8 versus 391.7 nmol of GalA.min<sup>-1</sup>. $\mu$ g<sup>-1</sup>). Protein structures were  
100 determined by X-Ray crystallography with the final models' geometry, processing and  
101 refinement statistics summarized in Table 1. We solved the crystal structure of PGLR (429 aa ,  
102 1-18 and 409-429 aa not modelled, PDB: 7B7A) at a resolution of 1.3 Å using molecular  
103 replacement with 1RMG<sup>17</sup> (Fig. 1A, Extended data Fig. 2A). PGLR crystallised as a single  
104 molecule in a P1 asymmetric unit. The crystal structure of ADPG2 (420 aa, 1-41 and 406-420  
105 aa not modelled, PDB: 7B8B) was resolved at a resolution of 2.0 Å using PGLR as the search  
106 model (Fig. 1A, Extended data Fig. 2B). ADPG2 crystals belonged to the orthorhombic space  
107 group P2<sub>1</sub>2<sub>1</sub>2<sub>1</sub> with chains A and B having a C $\alpha$  root mean square deviation (rmsd) of 0.924 Å.  
108 PGLR and ADPG2 fold in right-handed parallel  $\beta$ -helical structure, which is common to  
109 pectinases (Fig. 1A)<sup>11</sup>. This  $\beta$ -helix is formed by three repeating parallel  $\beta$ -sheets - PB1, PB2  
110 and PB3 which contain 11, 12, and 11 parallel  $\beta$ -strands respectively, as well as a small  $\beta$ -sheet,  
111 PB1a, having only 3  $\beta$ -strands (Extended data Fig. 3A-B). T1-turns, T1a-turns, T2-turns and  
112 T3-turns connect the PB1-PB2, PB1-PB1a, PB2-PB3 and PB3-PB1  $\beta$ -sheets, respectively  
113 (Extended data Fig. 3C-D)<sup>18</sup>. PGLR and ADPG2 show a  $\alpha$ -helix at the N-terminus, interacting  
114 with the T1 turn through the establishment of a disulphide bridge (PGLR, C46-C76, ADPG2,  
115 C71-C98), which shields the hydrophobic core of the enzyme<sup>19</sup>. Superimposition of PGLR and  
116 ADPG2 structures resulted in a rmsd of 2.299 Å, predominantly due to a deviation in the region  
117 surrounding the active site, in particular N130–P142 (T3 turn, PGLR numbering) and Y304-  
118 V318 (T1a turn, PGLR numbering). Between these loops, a large cleft (10.29 Å wide for PGLR  
119 and 14.46 Å for ADPG2), open at both sides is present, exposing PB1 for accommodating the  
120 substrate and identifying PGLR and ADPG2 as putative endo-PGs<sup>8,11,12</sup>.

### 121 **Structural determinants of absence of plant PG-plant PGIP interactions**

122 While PGLR and ADPG2 show low sequence identity with fungal enzymes (sequence  
123 identity: 19%-25% with AaPG1, AnPG1, AnPGII, FpPG1, PcPG1, CpPG1), they show high  
124 structural similarity with a rmsd of 4.753 to 7.761 Å between all atoms (Extended data Fig. 4A-

125 B). Still, PGLR does not interact with plant PGIPs, as shown by the lack of inhibition of PGLR  
126 activity by *Phaseolus vulgaris* PGIP2 (PvPGIP2)<sup>8</sup>, while this interaction exists with fungal  
127 PGs<sup>8,20</sup>. To understand the structural basis of this absence of inhibition of plant PG activity by  
128 PGIP we superimposed the resolved structures of PGLR and ADPG2 onto the *Fusarium*  
129 *phyllophilum* PG (FpPG1) - PvPGIP2 complex (Fig. 1B)<sup>13,20</sup>. In FpPG1, a S120-N121-S122-  
130 N123 stretch, within the protein's N-terminal loop, plays a key role in the PG-PGIP interaction  
131 (N121 notably interacting with H110 of PvPGIP2). PGLR and ADPG2 N-terminal loops are,  
132 on the other hand, rich in bulkier and chemically different residues, including M132, M133 and  
133 M137 for PGLR and K160, K162 and K166 for ADPG2 (Extended data Fig. 5). At the C-  
134 terminus, A274, the aa that contributes to hydrophobic-stabilizing interactions for the FpPG1-  
135 PGIP is replaced by G277/G278 and G303/G304 in PGLR and ADPG2, respectively (Fig.  
136 1C)<sup>20</sup>. Moreover, plant PGs have a specific H to P (P190/P216) substitution together with  
137 W275/Y301 insertion which can hinder the PG-PGIP interaction<sup>21</sup>. We next modelled AtPGIP1  
138 and AtPGIP2, which superimpose to PvPGIP2 with a rmsd of 1.194 and 1.201 Å, respectively  
139 (Fig. 1D). The analysis of the models for PGLR/ADPG2-AtPGIP1/AtPGIP2 complexes  
140 showed that multiple aa are involved in steric clashes (between 81 and 275 atom contacts  
141 depending of the PG-PGIP pair, Supplementary data File 1), which, together with the above-  
142 mentioned structural features, can explain the absence of the interaction between AtPGs and  
143 endogenous AtPGIPs, and lack of protein-mediated inhibition of PG activity in planta (Fig. 1E,  
144 Extended data Fig. 6A-B).

#### 145 **PGs with conserved active sites show differences alongside the binding groove subsites** 146 **known to be of importance for substrate interaction and processivity**

147 Comparison of PGLR and ADPG2 sequences and structures with that from bacteria and  
148 fungi reveal that the active site is formed by four conserved structural motifs NTD, DD, GHG,  
149 RIK positioned at subsites -1 and +1 of the PB1<sup>22-24</sup>. Eight of these aa N191/N217, D193/D219,  
150 H196/H222 D214/D240, D215/D241, H237/H263, R271/R297, K273/K299 (PGLR/ADPG2  
151 numbering) are strictly conserved with the three aspartates responsible for the hydrolysis of the  
152 substrate (Fig. 2A)<sup>10,19,23,25</sup>. To determine the importance of specific aa, five site-directed  
153 mutations were designed for PGLR: D215A occurring in the active site, R271Q (subsite +1),  
154 and the histidine mutants H196K, (subsite -1), H237K (subsite +1) and H196K/H237K  
155 (Extended data Fig. 7). Histidine residues could potentially modulate the activity of the enzyme  
156 by controlling the protonation state of residues placed in subsites flanking the hydrolysis site  
157 (Fig. 2A). Their activities, on PGA, and binding affinities (Kd) to the substrate (represented by

158 a mix of OGs of mean DP12 and DM5 and on which PGLR shows activity (Extended data Fig.  
159 8) were determined by MicroScale Thermophoresis (MST). D215A and R271Q mutations  
160 resulted in a total loss of activity with a substantial reduction in binding affinity (K<sub>d</sub> of 2567  
161 μM and 4840 μM for D215A and R271Q, respectively compared to 1246 μM for WT, Fig. 2B).  
162 While binding affinities of all histidine mutants were not significantly different, the H237K and  
163 H196K/H237K mutants showed no residual activity while the H196K mutant had featured only  
164 22% residual activity of the WT. Although having conserved active sites, sequence and  
165 structure analyses showed that twelve aa positioned alongside the binding groove (subsites from  
166 -5 to +5), previously shown to be of importance for substrate interaction and processivity differ  
167 between PGLR and ADPG2 (Fig. 2C-D) but as well with those of the fungal AaPG1 (Extended  
168 data Fig. 9)<sup>11,22,24</sup>. For instance, at subsite -5, PGLR harbours R146, that can be responsible for  
169 the interaction with a carboxylate group of GalA, while ADPG2 harbours T172. Similarly, at  
170 subsite -4, Q198 in PGLR is replaced by T224 in ADPG2. At subsite -4, -3 and -2 a patch  
171 formed by Q198, Q220 and the positively charged K246 in PGLR is mutated into T224, E246  
172 and D272 in ADPG2. At subsite -1 S269 in ADPG2, that can form hydrogen bonds with the  
173 substrate is mutated into G243 in PGLR. Finally, at subsite +2 and +3 D293 and K322 in  
174 ADPG2 are replaced by T267 and A296 in PGLR.

## 175 **Molecular dynamic (MD) simulations reveal distinct substrate-dependent dynamics of** 176 **PGLR and ADPG2**

177 The large number and chemical diversity of interactions across the binding groove make  
178 structural comparisons between different PG isoforms poorly informative. Such a diversity can  
179 result in different dynamic behaviours of enzymes and/or substrates, which could translate into  
180 different functional profiles. We performed MD simulations on PGLR and ADPG2 in complex  
181 with either a fully de-methylesterified (pattern 1) or 60% methylesterified (pattern 2)  
182 decasaccharides (Fig. 2E), able to occupy the totality of the binding groove (subsites from -5 to  
183 +5). We first simulated PGLR, PGLR H196K and H237K mutants in complex with fully de-  
184 methylesterified decasaccharides, and the analysis of substrate dynamics, through the  
185 quantification of subsite-specific root mean square fluctuations (RMSF), revealed a trend  
186 between enzymatic activity (Fig. 2B), substrate dynamics (Fig. 2F-H) and the total number of  
187 contacts between the substrate and enzymes (Extended data Fig. 10). MD simulations of the  
188 PGLR mutants (H196K and H237K) revealed how substrate dynamics is affected all along the  
189 binding groove, even with a single histidine mutation occurring in subsites either towards the  
190 non-reducing end (H196K – subsite -1) or the reducing end of the sugar (H237K – subsite +1).



191 Overall, a rigidification of the substrate coincides with the loss of activity observed in  
192 experiments (Fig. 2B), with the H237K mutant (total loss of activity) showing the lowest RMSF  
193 in subsites -1 to +5 compared to the H196K (22% residual activity) and the WT (highest  
194 substrate dynamics, Fig. 2G-H).

195 The substrate dynamics can be also seen when comparing the RMSF of ADPG2 and PGLR  
196 when in complex with either de-methylesterified or methylesterified deca-saccharides. For both  
197 enzymes, de-methylesterified oligomers are overall less dynamic, hence more tightly bound in  
198 the binding groove (Fig. 3A-B). Quantitative differences in the RMSF of the two complexes  
199 suggest that, for the same substrate either being de-methylesterified or partially  
200 methylesterified, the binding to PGLR is tighter. Moreover, for each substrate, ADPG2 retains  
201 a higher activity compared to PGLR (Extended data Fig. 1E), which again corroborates the  
202 observation that methylesterified substrates are overall less dynamic in complex with PGLR  
203 when compared to ADPG2 (Fig. 3A-B). The observed substrate dynamics is linked to the total  
204 number of contacts with the enzyme, with some noticeable differences between the two  
205 isoforms. When in complex with de-methylesterified substrates, both enzymes establish a larger  
206 number of contacts with the oligosaccharides. PGLR has however the ability to make a larger  
207 number of contacts, which is especially relevant for salt-bridges and hydrogen-bonds (Fig. 3C).  
208 The reduced substrate dynamics when bound to histidine PGLR mutants is also reverberated  
209 into a higher number of contacts (Extended data Fig. 10). A comparison of the enzymatic  
210 motions revealed that PGLR and ADPG2, while engaged to the same deca-saccharide substrate,  
211 explore separate conformational states, which are especially related to the fluctuations of  
212 unstructured regions flanking the binding groove. While for PGLR these are the regions  
213 flanking the substrate's non-reducing end (residues K108, R146, K169), in the case of ADPG2  
214 they flank the binding cleft and in proximity of the substrate's reducing end (Extended data Fig.  
215 11A-B). Relevant differences can also be observed between the electrostatic potentials of the  
216 two enzymes, calculated by solving the Poisson-Boltzmann equation in implicit solvent  
217 (Extended data Fig. 11C-D). Compared to ADPG2, PGLR shows a much more positively  
218 charged electrostatic potential within the substrate binding cleft, in line with pronouncedly  
219 reduced dynamics for a negatively charged (de-methylesterified) substrate, which would  
220 undergo much stronger electrostatically dominated interactions with the enzyme. Overall,  
221 subtle differences within the amino acidic composition of certain subsites can convey  
222 specifically different activity profiles from a seemingly identical fold, which is likely to  
223 generate distinct substrate binding affinities, and end-products.



## 224 **PGLR and ADPG2 differ in their binding kinetics and production of OGs**

225 The calculated RMSF shows differences in enzyme-substrate dynamics once the  
226 substrate is bound, which could reflect differences in the binding affinities of the enzymes  
227 towards specific substrates. Using fluorescence-based switchSENSE® aptasensor, we  
228 determined binding kinetics for enzyme-substrate interactions for both PGLR and ADPG2, by  
229 quantifying substrate association ( $k_{on}$ ) and dissociation ( $k_{off}$ ) rate constants, as well as  
230 equilibrium dissociation constant ( $K_D$ ) using substrates with various degree of polymerization  
231 and methylesterification (PGA, pectins DM30%, oligogalacturonides of DP12DM5,  
232 DP12DM30, DP12DM60, Table 2). ADPG2 displayed affinities much higher for low-DM  
233 substrates (i.e. PGA and DP12DM5) than those determined with the high-DM pectins ( $K_D$  *ca.*  
234 10 to 60 times lower; Table 2) and comparable to those of PGLR. Considering the kinetics  
235 constants, PGLR and ADPG2 show no difference for  $k_{on}$  for pectins of low DM, including PGA  
236 and DP12DM5 (1320/1120 and 953/833  $M^{-1}s^{-1}$ ), respectively. In contrast, when the DM of the  
237 substrate is increased (DM30%, DP12DM30 and DP12DM60), the  $k_{on}$  is always higher (~x 3  
238 to 16 times) for PGLR compared to ADPG2. This suggest that for methylesterified pectins,  
239 PGLR, in line with the MD simulations and lower RMSF compared to ADPG2, associates much  
240 tighter with the substrate. This is as well reflected by the lower  $K_D$  determined for PGLR  
241 compared to ADPG2. No such drastic differences are measured for  $k_{off}$ , as values for PGLR and  
242 ADPG2 are in the same range for most substrates.

243 To determine whether the differences in subsites structure, enzyme dynamics and  
244 binding affinities can translate into differences in the processivity of PGLR and ADPG2, we  
245 assessed the products generated by either of the enzymes. Using PGA as a substrate, PGLR or  
246 ADPG2 maximum activities were reached after 1-hour digestion, generating products that  
247 cannot be further hydrolysed. ADPG2 total activity was higher than that measured for PGLR.  
248 Furthermore, the addition of ADPG2 following a first hour substrate incubation with PGLR,  
249 led to an increase in total PG activity, confirming putative differences in processivity between  
250 the two enzymes, ADPG2 being able to hydrolyse PGLR's end-products (Fig. 4A). We then  
251 used a recently developed LC-MS/MS oligoprofiling approach<sup>26</sup> to analyse the reaction  
252 products and confirmed, using PGA as a substrate, that both enzymes have endo activities, as  
253 suggested by the structural features of the binding cleft, and that ADPG2 releases higher  
254 proportion of short-sized OGs (<DP4) compared to PGLR (Fig. 4B). On pectic substrates of  
255 DM 20-34%, the pool of OGs produced by PGLR differed to that of ADPG2 (Fig. 4C). In  
256 particular, PGLR released de-methylesterified OGs of DP5 to DP9, as well as specifically

257 methylesterified forms of more than 6 GalA units that were either poorly represented or absent  
258 in the pool of end-products produced by ADPG2. The main products of ADPG2 were indeed  
259 de-methylesterified OGs of DP2 to DP4, including GalA4Me (Fig. 4C, Fig. 4C, Inset). When  
260 comparing the OGs produced by PGLR, ADPG2 and AaPG1 upon enzymatic activity on  
261 pectins with DM between 20 and 34% using principal component analysis (PCA), PGLR and  
262 AaPG1 were separated according to the first dimension (Dim1 54.6.7% of the variance) while  
263 ADPG2 clustered according to second dimension (Dim2 40.4% of the variance), with main  
264 loadings being, as an example, GalA2, GalA3, GalA4Me2, GalA9Me (Extended data Fig. 12A-  
265 B). Overall, ADPG2 and PGLR have nearly identical folds that, through distinct subsite  
266 structure and enzymes' dynamics, could translate into different enzymatic processivities.  
267 Indeed, PGLR and ADPG2 differ in their intrinsic processivities,  $P^{\text{Intr}}$ , being described as the  
268 average number of consecutive catalytic acts before enzyme-substrate dissociation.  $P^{\text{Intr}}$  is  
269 dependent on the dissociation probability,  $P_d$ , calculated using the turnover number ( $k_{\text{cat}}$ ) and  
270 rate constant of dissociation ( $k_{\text{off}}$ )<sup>27</sup>.  $P_d$  values were  $4.8 \times 10^{-4}$  and  $4.0 \times 10^{-8}$ , and  $P^{\text{Intr}}$  values  
271 were  $2 \times 10^3$  and  $2.5 \times 10^7$ , for PGLR and ADPG, respectively. This data shows that, albeit  
272 acting both as processive enzymes ( $P_d \ll 1$ ), PGLR and ADPG2 differ in the extent by which  
273 they act on the substrate, with ADPG2 being much more processive than PGLR, as reflected  
274 by the lower size of the released products detected with LC-MS/MS.

275

## 276 **The differences in PGLR and ADPG2's processivities translate into distinct effects on** 277 **plant, affecting root development**

278 Considering the localization of the expression of *PGLR* and *ADPG2* during root  
279 development, we tested the activity of both enzymes on root cell walls, whose pectins can be  
280 both methylesterified and acetylated<sup>28</sup>. Noticeably, PGLR released a higher proportion of  
281 acetylated OGs (including GalA5Ac, GalA6Ac, GalA6Ac2) compared to ADPG2, in addition  
282 to longer oligomers on average (Fig. 5A, Fig. 5A, Inset). Similarly, to what was observed on  
283 methylated pectins, the main OGs produced by ADPG2 were unsubstituted OGs, GalA2 and  
284 GalA3. To determine whether distinct processivities translate into distinct phenotypes, we  
285 assessed the effects of the exogenous application of purified enzymes on roots development.  
286 Iso-activities of PGLR and ADPG2 were added in the culture medium of 6-day old seedlings  
287 for either one or three days, and phenotypical changes were measured. If the application of  
288 either of the enzymes for one day did not affect root length, ADPG2 significantly impaired root  
289 elongation after three days of application (Fig. 5B). In contrast, in these conditions, PGLR had  
290 no significant effects. (Fig. 5B). To determine if the consequences of PGLR and ADPG2

291 application on total root length were spatially localized, we then measured the length of the  
292 firsts 50 cells from the root tip after three days of enzymes' application, using EGFP-LTI6b  
293 reporter line that specifically labels plasma membrane (Fig. 5C)<sup>29</sup>. Cell length was not affected  
294 by the application of either of the enzymes up to the 40<sup>th</sup> cell. In contrast, the application of  
295 ADPG2 drastically reduced the length of the cells in the elongation zone as early as cell 40;  
296 while the effects measured for PGLR were from cell 46 onwards and were lower compared to  
297 that of ADPG2 (Fig. 5D). Further differences between the enzymes can be highlighted by  
298 analysing the morphology of the root cap, the structure at the tip of the root which supports  
299 growth and protects the root meristem. The application of ADPG2 for three days had much  
300 drastic effects on root cap detachment as compared to that of PGLR suggesting that it has more  
301 drastic effects on cell-to cell adhesion (Fig. 5E). Altogether, this shows that the biochemical  
302 specificities of the two enzymes can translate into distinct effects on development.

303

## 304 Discussion

305 Polygalacturonases (PGs) enzymes play a central role in the control of pectin chemistry,  
306 contributing to changes in the cell wall mechanics, with important consequences on plant  
307 development<sup>4-7</sup>. In Arabidopsis, PGs are encoded by 68 genes: an abundance which is hard to  
308 rationalize within the context of the plant cell wall. Here we elucidated the structure-to-function  
309 relationships for two plant PGs, PGLR and ADPG2, whose expression overlaps in Arabidopsis  
310 roots. Both enzymes have nearly identical triple  $\beta$ -helix folds commonly found in other  
311 pectinases, including fungal endo-PGs<sup>11,19,23</sup>, pectin/pectate lyases<sup>18,30,31</sup> and  
312 rhamnogalacturonases<sup>17</sup>, with a large cleft opened at both sides that accommodates oligomeric  
313 substrates and confirms that PGLR and ADPG2 are endo-PGs<sup>19</sup>. The resolution of the crystal  
314 structure for plant PGs first rationalized the structural determinants of the absence of inhibition  
315 of plant enzymes by plant PGIPs, as PGLR activity was indeed not inhibited by *Phaseolus*  
316 *vulgaris* PGIP (PvPGIP2)<sup>8</sup>. Structurally, the key aa of *Fusarium phyllophilum* FpPG1 (S120-  
317 N121-S122-N123) needed for determining the interaction of this pathogenic PG with PvPGIP2,  
318 are absent in the T3 loop of PGLR and ADPG2. The homology modelling of Arabidopsis  
319 AtPGIP1 and AtPGIP2 further highlighted the absence of PGIP-mediated regulation of  
320 endogenous PG activity in plants as, albeit having highly conserved structure with that of  
321 PvPGIP2, they are lacking H110 and Q224 residues, required for inhibition<sup>32</sup>. This suggests  
322 that cellular regulation of PG is mediated by other means at the cell wall, one of which being,  
323 as demonstrated in this study, the differential processivities of the enzymes.

324 The main challenge in understanding subtle differences between isoforms of PGs and  
325 other carbohydrate binding enzymes (CBEs) are mostly related to the large binding interface  
326 that characterizes the interaction between CBEs and oligomeric substrates. We tackled this  
327 challenge by designing strategic mutations across the binding cleft of the structurally  
328 characterized PGLR and functionally analyzing the enzymes with combined computational and  
329 experimental methodologies. Our findings confirmed the importance of D215 for substrate  
330 hydrolysis, as well as R271 in binding and positioning the substrate at the catalytic subsite +1,  
331 as previously reported for fungal PGs<sup>19,25</sup>. Besides residues actively important in stabilizing the  
332 substrate, we find that other interactions in subsites flanking the catalytic subsite, crucially  
333 regulate substrate dynamics and correlate with enzymatic activity. Histidine to lysine mutants  
334 in PGLR (H196K, H237K and H196K/H237K), that might generally be important in  
335 controlling the observed pH-dependent activity of other PGs, show how the distribution of  
336 charges affects substrate dynamics. Most interestingly, substrate rigidification reported by MD  
337 upon the insertion of a positive charges across the substrate binding interface, negatively

338 impacts enzymatic activity as reported by the experimental biochemical characterization of the  
339 mutants. The importance of substrate dynamics in the activity of other CBEs has been also  
340 previously reported<sup>33,34</sup> and it might be a key factor in regulating the processive activity of  
341 CBEs more generally, with processivity being limited by substrate dissociation.

342 We next investigated whether the processivities of PGLR and ADPG2 differ, which  
343 could be related to their different subsite's composition affecting enzymes' dynamics. For  
344 instance, D293 and K322 in ADPG2 are replaced by T267 and A296 in PGLR, which could  
345 modify the enzyme-substrate interaction and the enzyme specificity. The determination of the  
346 dynamics, measured as the RMSF, of the enzymes in complex with a decasaccharide of GalA  
347 showed that i) for a given enzyme, the enzyme's dynamics differs with the DM of the substrate  
348 and ii) ADPG2 was overall more dynamic, with a higher RMSF, as compared to PGLR.  
349 Together with these simulations, the determination of the binding kinetics of the enzyme-  
350 substrate interactions led to hypothesizing distinct processivities for the two enzymes. When  
351 considering pectins of high DM (30%, DP12DM30, DP12DM60), the affinities of both  
352 enzymes are  $k_{on}$ -dominated, with PGLR associating much tighter with the substrate.  
353 Interestingly, the affinity of ADPG2 for the low-DM substrates is higher than that towards the  
354 high-DM pectins and is comparable to the affinities determined for PGLR. Considering the  
355 lubricating hypothesis, inferred from the studies on pectin methylesterases, and intrinsic  
356 processivity calculations, ADPG2 acts more processively on the HG chain than PGLR, and that  
357 would occur more favourably with low-DM substrates (Fig 6A-B)<sup>33</sup>. Altogether, these results  
358 are in accordance with the lower RMSF measured for PGLR, which would impair the sliding  
359 of the enzyme onto the chain, leading to enzyme-substrate dissociation and reiteration of  
360 enzyme attack onto the chain (Fig. 6A). Such distinct processivities effectively translated into  
361 different end-products, with ADPG2 releasing OGs of short DP (methylesterified or not) from  
362 either commercial substrates or root cell wall extracts, while PGLR released a high proportion  
363 of non-methylesterified OGs of higher DP, compared to ADPG2 (Fig. 6B). As highlighted by  
364 the fact that ADPG2 can hydrolyse PGLR-generated OGs, one could envisage a cooperative  
365 action of both enzymes in the cell wall to finely-tune HG structure during root development. A  
366 number of studies previously showed the impact of the changes in PG activity, either through  
367 the study of loss-of-function mutants or over-expressing lines in Arabidopsis, on developmental  
368 processes as diverse as dark-grown hypocotyl development, stomata formation and root  
369 development<sup>3-8</sup>. Our study now allows linking the enzymes' processivities to their impact on  
370 cell wall and pectins' integrity and plant development. The consequences of the exogenous  
371 application of the processive ADPG2 had indeed stronger effect on root development, including

372 defects in root elongation and in cell adhesion at the root cap, compared to that of PGLR. The  
373 root cap phenotype of ADPG2-treated roots is similar to that reported for *RCPG1*  
374 overexpressing lines, known to be involved in root cap removal, suggesting that enzymes might  
375 share common biochemical specificities and/or processivities<sup>35</sup>.

376 Our work demonstrates that albeit having a highly conserved structural fold, subtle  
377 differences in PG structures translate into differences in enzymes' dynamics, substrate  
378 specificities, kinetics, leading to distinct processivities that play a role in the fine-tuning of plant  
379 development. This shows the extent by which, among the multigenic family, each of the  
380 isoforms has peculiar specificities that are required to control temporally and spatially pectin  
381 structure. This further highlight that, for this class of enzymes, the gene redundancy at the  
382 genome level is unlikely to reflect redundant biochemical specificities. Our study now paves  
383 the way for a better understanding of how PG's processivities can control polysaccharides  
384 chemistry and mechanical properties *in muro*.

385

## 386 **Material and methods**

### 387 **Sequences retrieval and analysis**

388 *Arabidopsis thaliana* PGLR (At5g14650) and ADPG2 (At2g48150) coding sequences were  
389 retrieved from publicly available genome database TAIR (<https://www.arabidopsis.org/>). The  
390 presence of putative signal peptide was predicted using SignalP-5.0 Server  
391 (<http://www.cbs.dtu.dk/services/SignalP/>). Glycosylation sites were predicted using NetNGlyc  
392 1.0 Server (<http://www.cbs.dtu.dk/services/NetNGlyc/>). Sequence alignments were performed  
393 using MEGA and Clustal Omega multiple sequence alignment programs<sup>36</sup>.

### 394 **Cloning, heterologous expression and purification of PGLR and ADPG2**

395 PGLR was previously expressed in the yeast *Pichia pastoris* and biochemically characterized<sup>8</sup>.  
396 PGLR mutants were created using cDNA and specific primers carrying mutations (Extended  
397 data Table 1). At2g41850 (ADPG2) coding sequence was codon-optimized for *Pichia pastoris*  
398 expression. Cloning and protein expression was done as previously described<sup>8,37</sup>.

### 399 **PGLR and ADPG2 enzyme analysis**

400 Bradford method was used to determine the protein concentration, with bovine serum albumin  
401 (A7906, Sigma) as a standard. Deglycosylation was performed using Peptide-N-Glycosidase F  
402 (PNGase F) at 37 °C for one hour according to the supplier's protocol (New England Biolabs,  
403 Hitchin, UK). Enzyme purity and molecular weight were estimated by 12 % SDS-PAGE using



404 mini-PROTEAN 3 system (BioRad, Hercules, California, United States). Gels were stained  
405 using PageBlue Protein Staining Solution (Thermo Fisher Scientific) according to the  
406 manufacturer's protocol.

#### 407 **PGLR and ADPG2 biochemical characterization**

408 The substrate specificity of PGLR and ADPG2 were determined with the DNS method as  
409 previously described<sup>8,37</sup>. Polygalacturonic acid (PGA, 81325, Sigma); Citrus pectin with DM  
410 20-34% (P9311, Sigma), DM 55-70% (P9436, Sigma) were used as substrates. Results were  
411 expressed as nmol of GalA.min<sup>-1</sup>.µg<sup>-1</sup> of proteins. The optimum temperature was determined  
412 by incubating the enzymatic reaction between 25 and 60°C during 60 min using PGA (0.4%,  
413 w/v) at pH5. The pH optimum was determined between pH 4 and 7 using sodium acetate buffer  
414 (pH 3 to 5) and phosphate citrate buffer (pH 6 to 8) and 0.4 % (w/v) PGA as a substrate. The  
415 PGLR and ADPG2 kinetic parameters were calculated using GraphPad Prism8 (version 8.4.2.)  
416 with PGA as a substrate. The reactions were performed using 1 to 8 mg.ml<sup>-1</sup> PGA  
417 concentrations during 10 min at 25°C in 50 mM sodium acetate (pH5). All experiments were  
418 realized in triplicate.

#### 419 **Digestion of cell wall pectins and released OGs profiling**

420 OGs released after digestions by recombinant PGLR and ADPG2 were identified as  
421 described<sup>26</sup>. Briefly, PGA (81325, Sigma) or citrus pectin with DM 24-30% (P9311, Sigma) or  
422 OGs DP12DM5 (degree of polymerization centered on 12 and average DM of 5%) were  
423 prepared at 0.4 % (w/v) final concentration diluted in 100 mM ammonium acetate buffer (pH  
424 5) and incubated with either PGLR and ADPG2 at 0.03 µg.µL<sup>-1</sup>. Non-digested pectins were  
425 pelleted by centrifugation and the supernatant dried in speed vacuum concentrator  
426 (Concentrator plus, Eppendorf, Hamburg, Germany). The same procedure was applied for  
427 pectins from roots of Arabidopsis seedlings that were grown for 7 days at 21 °C, 16 h/8 h  
428 light/dark photoperiod. Roots were cut, incubated in ethanol 100 % (w/v) for 24 h, washed two  
429 times 5 min with acetone 100 % (w/v) and left to dry 24 h. Thirty roots per replicate were  
430 rehydrated in 150 µL 100 mM ammonium acetate pH 5 during 2 h on room temperature and  
431 digested with PGLR and ADPG2 at 0.02 µg.µL<sup>-1</sup> on average, using the above-mentioned  
432 protocol. Separation of OGs was done using an ACQUITY UPLC Protein BEH SEC column  
433 (125Å, 1.7 µm, 4.6 mm x 300 mm), and the analysis was done as described<sup>37</sup>.

434



### 435 **Microscale thermophoresis**

436 Molecular interactions between PGLRs (WT and mutants) and selected OGs was done using  
437 Microscale thermophoresis (MST) approach as described with some modifications<sup>38</sup>. Briefly,  
438 PGLRs were labelled with monolith protein labelling kit blue NHS amine reactive (Lys,  
439 NanoTemper, catalog no. MO-L003) and conserved in MST buffer (50 mM Tris pH 7.4, 150  
440 mM NaCl, 10 mM MgCl<sub>2</sub>, 0.05 % tween-20). For all experiments, constant final concentration  
441 of labelled PGLRs was 1650 μM. Mix of OGs centred on DP12DM5 was prepared at 14028  
442 μM concentration in MST buffer/dH<sub>2</sub>O in 1:1 ratio. For all experiments, a constant  
443 concentration of labelled PGLRs was titrated with decreasing concentrations of non-labelled  
444 DP12DM5 from 7014 to 0.214 μM. The resulting mixtures were loaded into a Monolith NT.115  
445 series standard capillaries (NanoTemper, catalogue no. MO-K002). Thermophoresis  
446 experiments were performed with 40% of MST power and 20% of LED power for fluorescence  
447 acquisition.

### 448 **Time-resolved molecular dynamics measurements**

449 PGLR and ADPG2 (used as ligands) were immobilized on an electro-switchable DNA biochip  
450 MPC-48-2-R1-S placed into a biosensor analyzer switchSENSE® DRX (Dynamic Biosensors  
451 GmbH, Planegg, Germany). For that, a covalent conjugate between PGLR or ADPG2 and a  
452 48mer ssDNA was first prepared with the amine coupling kit supplied by Dynamic Biosensors  
453 and purified by anion-exchange chromatography onto a proFIRE® system (Dynamic  
454 Biosensors), then hybridized with a complementary ssDNA attached on the surface of the  
455 biochip and carrying a Cy5 fluorescent probe at its free extremity. When analytes injected in  
456 the microfluidic system bind to the oscillating dsDNA nanolevers, the nanolever movement is  
457 altered by the additional friction imposed. Kinetic measurements for 2 min (association) and  
458 for 5 min (dissociation) were performed in 5 mM sodium acetate buffer, pH 5.5, with a flow  
459 rate of 100 μl.min<sup>-1</sup> at 25°C with different concentrations of various analytes: PGA (81325,  
460 Sigma), citrus pectin with DM 24-30% (P9311, Sigma) and pool of OGs centred on DP12DM5,  
461 DP12DM30 and DP12DM60 at 25, 50 and 100 μM. The fluorescence traces were analysed with  
462 the switchANALYSIS® software (V1.9.0.33, Dynamic Biosensors). The association and  
463 dissociation rates ( $k_{on}$  and  $k_{off}$ ), dissociation constant ( $K_D = k_{off}/k_{on}$ ) and the error values were  
464 derived from a global single exponential fit model, upon double referencing correction (blank  
465 and real-time)<sup>38</sup>. The experiments were performed in three replicates.

466

## 467 **Intrinsic processivity calculations**

468 The intrinsic processivity potential ( $P^{Intr}$ ), a parameter corresponding to the number of  
469 consecutive catalytic steps before dissociation from the substrate was used as a measure of the  
470 processivities of PGLR and ADPG2 as described in Horn et al.<sup>27</sup>. The calculation of  $P^{Intr}$  is  
471 given in the Eq. 1.

$$472 \quad (\text{Eq. 1}) \quad P^{Intr} = -\frac{1}{\ln(1 - P_d)}$$

473 The dissociation probability ( $P_d$ ) is expressed as a rate constant for two processes; (i) the  
474 turnover number ( $k_{cat}$ ) and (ii) the enzyme–substrate complex dissociation constant ( $k_{off}$ ).  $P_d$  is  
475 related to  $k_{cat}$  and  $k_{off}$  according to Eq. 2. In the case of processive enzymes  $P_d \ll 1$ .

$$476 \quad (\text{Eq. 2}) \quad P_d = \frac{k_{off}}{k_{off} + k_{cat}}$$

477 The turnover number ( $k_{cat}$ ) was calculated using GraphPad Prism8 (version 8.4.2.) by fitting  
478 the non-linear regression curve following the Eq. 3, where Y is enzyme velocity, X is the  
479 substrate concentration, Km is the Michaelis-Menten constant in the same units as X and Et is  
480 the concentration of enzyme catalytic sites.

$$481 \quad (\text{Eq. 3}) \quad k_{cat} = \frac{Y * (Km + X)}{Et * X}$$

482

## 483 **Crystallization of proteins**

484 PGLR and ADPG2 were concentrated at 10 mg.ml<sup>-1</sup>. Crystallization was performed using the  
485 sitting-drop vapour-diffusion method. Crystallisation conditions were screened using a  
486 mosquito robot (TTP Labtech) and the PACT premier plate (Molecular dimensions, Sheffield,  
487 UK). PGLR and ADPG2 (100 nL) were mixed with an equal volume of precipitant (1:1). The  
488 crystals that resulted in best diffraction data were obtained with 0.2 M sodium fluoride, 0.1 M  
489 bis-tris propane pH 8.5, 20 % w/v PEG 3350 (H1 condition, PACT premier plate) for PGLR  
490 and 0.2 M sodium malonate dibasic monohydrate, 20 % w/v PEG 3350 (E12 condition, PACT  
491 premier plate) for ADPG2. Crystals for PGLR and ADPG2 formed after 6 and 2 months,  
492 respectively. Scale-up of the best condition was realized by mixing 1  $\mu$ l of the best precipitant  
493 condition with 1  $\mu$ l of the enzyme in the hanging drop vapor-diffusion method.

## 494 **X-ray data collection and processing**

495 Crystals were mixed with precipitation solution and PEG 3350 (35% w/v) before mounting in  
496 a loop and flash cooling in liquid nitrogen. The diffraction data were collected at PROXIMA-1  
497 beamline (Synchrotron Soleil, Saint Aubin, France), at a temperature of  $-173^{\circ}\text{C}$  using a  
498 PILATUS 6M end EIGER 16M detector (Dectris). Data were collected using X-rays with  
499 wavelength of  $0.978564 \text{ \AA}$ . For PGLR, three data sets were collected from the same crystal at  
500  $1.3 \text{ \AA}$  resolution. Intensities were integrated, scaled and merged using XDS<sup>39</sup> and XSCALE<sup>40</sup>.  
501 For ADPG2, one data set was collected at  $2.03 \text{ \AA}$  resolution. Intensities were processed using  
502 XDS<sup>39</sup>. PGLR crystal belonged to triclinic space group P1 with one molecule in asymmetric  
503 unit, while ADPG2 belongs to orthorhombic space group  $P2_12_12_1$  with two molecules in  
504 asymmetric units.

## 505 **Structure solution and refinement and analysis**

506 For PGLR and ADPG2 structure and function prediction I-TASSER prediction software was  
507 used<sup>41</sup>. ColabFold was used for AtPGIP1 and AtPGIP2 models<sup>42</sup>. The structure of PGLR was  
508 solved by molecular replacement using *Phaser*<sup>43</sup>. The data were phased using  
509 rhamnogalacturonase A (PDB: 1RMG, Uniprot: Q00001) as a search model<sup>17</sup>. Model was built  
510 using *Autobuild* and refined using *Refine* from PHENIX suite<sup>44</sup>. The model was iteratively  
511 improved with *Coot*<sup>45</sup> and *Refine*. ADPG2 structure was solved by molecular replacement using  
512 PGLR as a starting model and the above-mentioned iterative procedure. The final structure for  
513 PGLR and ADPG2 have been deposited in the Protein Data Bank as entries 7B7A and 7B8B,  
514 respectively. UCSF Chimera was used for creation of graphics<sup>46</sup>.

## 515 **Modelling and molecular dynamics simulations**

516 Molecular dynamics (MD) simulations were carried out on both the WT PGLR and ADPG2  
517 proteins in complex with fully de-methylesterified polygalacturonate decasaccharides, as well  
518 as partially methylesterified polygalacturonate decasaccharides. Additionally, PGLR mutants  
519 H196K and H237K, modelled from the resolved X-ray crystal structures using PyMOL, were  
520 also simulated, in complex with fully de-methylesterified polygalacturonate decasaccharides<sup>47</sup>.  
521 Molecular topologies of the complexes were created according to the parameters of the  
522 AMBER14SB\_parmbsc1 forcefield<sup>48</sup>. The complexes were placed in cubic boxes with a solute-  
523 box distance of 1.0 nm and solvated with water molecules parameterised according to the TIP3P  
524 water model<sup>49</sup>. To neutralise the system's net charge and reach a salt concentration of 0.165 M,  
525  $\text{Na}^+$  and  $\text{Cl}^-$  ions were added before energy-minimisation was performed.

526 The systems were then energy minimized, to resolve clashes between particles using a steep-  
527 descent algorithm with a step size of 0.01, considering convergence when the particle-particle  
528 force was  $1000 \text{ kJ mol}^{-1} \text{ nm}^{-1}$ . Particle-particle forces were computed considering van der  
529 Waals and electrostatic interactions occurring up to 1.0 nm, treating long-range electrostatics  
530 in the Fourier space using the Particle Mesh Ewald (PME) summation method.

531 After minimization, solvent equilibration was achieved in two stages to reach constant  
532 temperature and pressure. The first stage was performed in the nVT ensemble while the second  
533 in the nPT ensemble. Solvent equilibration through the nVT ensemble was carried out for 1 ns,  
534 with the equation of motion integrated with a time step of 2 fs, targeting a reference temperature  
535 of 310.15 K coupled every 0.1 ps using the V-rescale thermostat<sup>50</sup>.

536 In this step, each particle in the system was assigned random velocities based on the Maxwell-  
537 Boltzmann distribution<sup>51</sup> obtained at 310.15 K. Equilibration of the solvent through the nPT  
538 ensemble was then carried out for 1 ns starting from the last step (coordinates and velocities)  
539 of the previous equilibration, at a reference temperature of 310.15 K, coupled every 0.1 ps using  
540 the V-rescale thermostat<sup>50</sup>. In this step, pressure coupling was conducted at 1 bar, with pressure  
541 coupled isotropically every 2.0 ps using the Parrinello-Rahman barostat<sup>52</sup>. Particle-particle  
542 interactions were calculated by building pair lists using the Verlet scheme. A cutoff of 1.0 nm  
543 was used to compute short-range van der Waals and electrostatic interactions sampled via a  
544 Coulomb potential. The Particle Mesh Ewald (PME) algorithm<sup>53</sup>, with a Fourier grid spacing  
545 of 0.16 and a cubic B-spline interpolation level of 4, was used to compute, in the Fourier space,  
546 long-range electrostatic interactions past the cutoff.

547 Simulations were then performed on both in-house machines and on NeSI's (New Zealand  
548 eScience Infrastructure) high performance cluster, Mahuika, using GROMACS (Groningen  
549 MACHine for Chemical Simulation) version 2020.5<sup>54</sup>. For each of the 6 complexes, simulations  
550 were run for 200 ns using a time step of 2 fs and replicated 5 times for a total simulation time  
551 of 1  $\mu\text{s}$  per complex. Each replicate differed in terms of the random sets of particle velocities  
552 generated through the nVT ensemble. Molecular dynamics trajectories were recorded every 10  
553 ps. For analysis, the first 50 ns of each production run were considered equilibration time and  
554 discarded.

555 Analyses were conducted using in-house Python 3 scripts implemented Jupyter notebooks<sup>55</sup>.  
556 Porcupine plots were created using data from a normalised principal component analysis  
557 calculated using GROMACS. Figures were created and rendered with Matplotlib<sup>56</sup>, VMD  
558 (Visual Molecular Dynamics)<sup>57</sup> and UCSF Chimera<sup>46</sup>.

559

## 560 **Poisson-Boltzmann calculations of electrostatic potentials**

561 The protonation states of each amino acid were assigned according to the pKa curves calculated  
562 at pH = 4 for PGLR and pH = 5 for ADPG2, using the PROPKA software<sup>58</sup>. Atomic charges  
563 and radii for the protein atoms were assigned using the PDB2PQR software<sup>59</sup> according to the  
564 parameters of the AMBER14SB\_parmbsc1 forcefield<sup>48</sup>, while atomic charges and radii for the  
565 sugar atoms were obtained from our previous work<sup>60</sup>. The surface electrostatic potentials for  
566 WT PGLR and ADPG2 were then calculated solving the non-linearized form of the Poisson-  
567 Boltzmann equation through the APBS (Adaptive Poisson–Boltzmann Solver) software on a  
568 cubic grid composed of 193 grid points across the x-, y- and z- directions<sup>61</sup>. These calculations  
569 followed a stepwise approach where the Poisson-Boltzmann equation is first solved on a coarse  
570 mesh grid with a length of 155 Å and a spacing of 0.8 Å; then on a fine mesh grid with a length  
571 of 125 Å and a spacing of 0.64 Å. Calculations were solved considering a temperature of 218.15  
572 K with a mobile ionic charge of +/- 1 e<sub>c</sub>, an ionic concentration of 0.165 M and an ionic radius  
573 of 2.0 Å. The protein dielectric constant was set at 4.0 and the solvent dielectric constant was  
574 set to 78.54. The protein surface electrostatic potentials were then visualised and coloured on  
575 the protein's molecular surface using VMD<sup>57</sup>.

576

## 577 **Exogenous application of enzymes on Arabidopsis seedlings**

578 20-30 sterile seeds of Arabidopsis thaliana EGFP-LTI6b<sup>29</sup> plasma membrane marker-lines were  
579 sowed in 400 µL liquid Arabidopsis Murashige and Skoog medium (Sucrose, MES (Duchefa  
580 monohydrate), MS commerciale in 24 well-plates<sup>62</sup>. After 48 hours stratification, plates were  
581 placed in growth chamber under long day conditions (16 hours photoperiod, 120µmoles/m<sup>2</sup>/s,  
582 21°C). After 6 days, cultures were supplemented with 0.051 µg/µL and 0.015 µg/µ filter-  
583 sterilized PGLR and ADPG2, respectively using 0.2 µm PES filter (Whatman TM Puradisc TM  
584 13 mm) in a volume of liquid MS medium of 200 µL to reach iso-activity. Plantlets were  
585 allowed to grown for another 1 day (T1) or 3 days (T3). Negative controls correspond to 6-, 7-  
586 or 9-days cultures without enzyme (T0 ØEnz, T1 ØEnz and T3 ØEnz, respectively). For each  
587 of these conditions, measurements of primary root lengths were done using ImageJ software  
588 with NeuronJ plugin. For each condition, 30-40 plants were measured. For cell lengths  
589 determination, approximately 1 mm from the tip of the root of 3 to 7 plants were photographed  
590 under a stereomicroscope (ZEISS SteREO Discovery.V20). Images were assembled using  
591 MosaicJ plugin from Image J. The length of the firsts 50 epidermal cells, starting from the first  
592 cell of the columella, were measured using image J software with NeuronJ plugin. Phenotypical

593 observations were performed following ruthenium red staining (0.05 % (w/v) in water, Sigma-  
594 Aldrich R-2751) under binocular microscope (Leica EZ4).

595

596 **Acknowledgements**

597 This work was supported by a grant from the Agence Nationale de la Recherche (ANR-17-  
598 CE20-0023) and by the Conseil Regional Hauts-de-France and the FEDER (Fonds Européen  
599 de Développement Régional) through a PhD studentship awarded for to J.S. We wish to thank  
600 Pierre Legrand and all the staff at Proxima1 beamline (Synchrotron SOLEIL, Gif sur Yvette,  
601 France) for X-ray diffraction and data collection. The technical assistance of Maša Boras, a  
602 former master student is gratefully acknowledged.

603 **Author's contribution**

604 J.P., F.S., V.L. and D.M. designed research; J.S., W.T., V.U., A.L., O.H.; J.B., A.V., S.B., M.R.,  
605 P.P., E.B., S.P., D.S.L, M.M.R., J-M.G., D.M., C. P-R., and V.L. performed research; J.S.,  
606 W.T., V.U., A.L., R.M., J-X.F., J-M.G., D.M., V.L., F.S. and J.P. analyzed data; J.S., W.T.,  
607 F.S., V.L., D.M., and J.P. wrote the paper with input from J.B., E.B., J-M.G, M.M.R.

608

609 **Conflicts of interest**

610 There are no conflicts of interest.

611

612

613

614

615

616

617

618

619

620

621

622



623 **Literature**

- 624 1. Bidhendi, A. J. & Geitmann, A. Relating the mechanics of the primary plant cell wall  
625 to morphogenesis. *J. Exp. Bot.* **67**, 449–461 (2016).
- 626 2. Mohnen, D. Pectin structure and biosynthesis. *Curr. Opin. Plant Biol.* **11**, 266–277  
627 (2008).
- 628 3. Rhee, S. Y., Osborne, E., Poindexter, P. D. & Somerville, C. R. Microspore Separation  
629 in the quartet 3 Mutants of Arabidopsis Is Impaired by a Defect in a Developmentally  
630 Regulated Polygalacturonase Required for Pollen Mother Cell Wall Degradation. *Plant*  
631 *Physiol.* **133**, 1170–1180 (2003).
- 632 4. Ogawa, M., Kay, P., Wilson, S. & Swain, S. M. Arabidopsis Dehiscence Zone  
633 Polygalacturonase1 (ADPG1), ADPG2, and Quartet2 are polygalacturonases required  
634 for cell separation during reproductive development in Arabidopsis. *Plant Cell* **21**,  
635 216–233 (2009).
- 636 5. Xiao, C., Somerville, C. & Anderson, C. T. POLYGALACTURONASE INVOLVED  
637 IN EXPANSION1 functions in cell elongation and flower development in Arabidopsis.  
638 *Plant Cell* **26**, 1018–1035 (2014).
- 639 6. Xiao, C. *et al.* Activation tagging of Arabidopsis POLYGALACTURONASE  
640 INVOLVED IN EXPANSION2 promotes hypocotyl elongation, leaf expansion, stem  
641 lignification, mechanical stiffening, and lodging. *Plant J.* **89**, 1159–1173 (2017).
- 642 7. Rui, Y. *et al.* POLYGALACTURONASE INVOLVED IN EXPANSION3 functions in  
643 seedling development, rosette growth, and stomatal dynamics in Arabidopsis thaliana.  
644 *Plant Cell* **29**, 2413–2432 (2017).
- 645 8. Hocq, L. *et al.* The exogenous application of AtPGLR, an endo -polygalacturonase,  
646 triggers pollen tube burst and repair. *Plant J.* **103**, 617–633 (2020).
- 647 9. Mutuku, J. M., Cui, S., Yoshida, S. & Shirasu, K. Orobanchaceae parasite–host  
648 interactions. *New Phytol.* **230**, 46–59 (2021).
- 649 10. Markovič, O. & Janeček, Š. Pectin degrading glycoside hydrolases of family 28:  
650 sequence-structural features, specificities and evolution. *Protein Eng. Des. Sel.* **14**,  
651 615–631 (2001).

- 652 11. Cho, S. W., Lee, S. & Shin, W. The X-ray structure of *Aspergillus aculeatus*  
653 Polygalacturonase and a Modeled structure of the Polygalacturonase-Octagalacturonate  
654 Complex. *J. Mol. Biol.* **311**, 863–878 (2001).
- 655 12. Abbott, D. W. & Boraston, A. B. The Structural Basis for Exopolygalacturonase  
656 Activity in a Family 28 Glycoside Hydrolase. *J. Mol. Biol.* **368**, 1215–1222 (2007).
- 657 13. Benedetti, M. *et al.* Structural resolution of the complex between a fungal  
658 polygalacturonase and a plant polygalacturonase-inhibiting protein by small-angle x-  
659 ray scattering. *Plant Physiol.* **157**, 599–607 (2011).
- 660 14. Ferrari, S. *et al.* Oligogalacturonides: plant damage-associated molecular patterns and  
661 regulators of growth and development. *Front. Plant Sci.* **4**, 1–9 (2013).
- 662 15. Davidsson, P. *et al.* Short oligogalacturonides induce pathogen resistance-associated  
663 gene expression in *Arabidopsis thaliana*. *BMC Plant Biol.* **17**, 1–17 (2017).
- 664 16. González-Carranza, Z. H., Elliott, K. A. & Roberts, J. A. Expression of  
665 polygalacturonases and evidence to support their role during cell separation processes  
666 in *Arabidopsis thaliana*. *J. Exp. Bot.* **58**, 3719–3730 (2007).
- 667 17. Petersen, T. N., Kauppinen, S. & Larsen, S. The crystal structure of  
668 rhamnogalacturonase a from *Aspergillus aculeatus*: A right-handed parallel  $\beta$  helix.  
669 *Structure* **5**, 533–544 (1997).
- 670 18. Yoder, M. D. & Journak, F. The Refined Three-Dimensional Structure of Pectate Lyase  
671 C Implications for an Enzymatic Mechanism. *Plant Physiol* **107**, 349–364 (1995).
- 672 19. van Santen, Y. *et al.* 1.68-angstrom crystal structure of endopolygalacturonase II from  
673 *Aspergillus niger* and identification of active site residues by site-directed mutagenesis.  
674 *J. Biol. Chem.* **274**, 30474–30480 (1999).
- 675 20. Benedetti, M. *et al.* A single amino-acid substitution allows endo-polygalacturonase of  
676 *Fusarium verticillioides* to acquire recognition by PGIP2 from *Phaseolus vulgaris*.  
677 *PLoS One* **8**, 1–11 (2013).
- 678 21. Federici, L. *et al.* Structural requirements of endopolygalacturonase for the interaction  
679 with PGIP (polygalacturonase-inhibiting protein). *Proc. Natl. Acad. Sci. U. S. A.* **98**,  
680 13425–13430 (2001).

- 681 22. André-Leroux, G., Tessier, D. & Bonnin, E. Endopolygalacturonases reveal molecular  
682 features for processivity pattern and tolerance towards acetylated pectin. *Biochim.*  
683 *Biophys. Acta - Proteins Proteomics* **1794**, 5–13 (2009).
- 684 23. Shimizu, T., Nakatsu, T., Miyairi, K., Okuno, T. & Kato, H. Active-site architecture of  
685 endopolygalacturonase I from *Stereum purpureum* revealed by crystal structures in  
686 native and ligand-bound forms at atomic resolution. *Biochemistry* **41**, 6651–6659  
687 (2002).
- 688 24. Pagès, S., Heijne, W. H. M., Kester, H. C. M., Visser, J. & Benen, J. A. E. Subsite  
689 mapping of *Aspergillus niger* endopolygalacturonase II by site-directed mutagenesis. *J.*  
690 *Biol. Chem.* **275**, 29348–29353 (2000).
- 691 25. Park, K.-C., Kwon, S.-J., Kim, P.-H., Bureau, T. & Kim, N.-S. Gene structure  
692 dynamics and divergence of the polygalacturonase gene family of plants and fungus.  
693 *Genome* **51**, 30–40 (2008).
- 694 26. Voxeur, A. *et al.* Oligogalacturonide production upon *Arabidopsis thaliana*-*Botrytis*  
695 *cinerea* interaction. *Proc. Natl. Acad. Sci. U. S. A.* **116**, 19743–19752 (2019).
- 696 27. Horn, S. J., Sorlie, M., Vårum, K. M., Våljamäe, P. & Eijsink, V. G. H. Measuring  
697 processivity. *Methods Enzymol.* **510**, 69–95 (2012).
- 698 28. Willats, W. G. T., McCartney, L., Mackie, W. & Knox, J. P. Pectin: cell biology and  
699 prospects for functional analysis. *Plant Mol. Biol.* **47**, 9–27 (2001).
- 700 29. Kurup, S. *et al.* Marking cell lineages in living tissues. *Plant J.* **42**, 444–453 (2005).
- 701 30. Vitali, J., Schick, B., Kester, H. C. M., Visser, J. & Journak, F. The Three-Dimensional  
702 Structure of *Aspergillus niger* Pectin Lyase B at 1.7-Å Resolution. *Plant Physiol.* **116**,  
703 69–80 (1998).
- 704 31. Lietzke, S. E., Scavetta, R. D., Yoder, M. D. & Journak, F. The Refined Three-  
705 Dimensional Structure of Pectate Lyase E from *Erwinia chrysanthemi* at 2.2 Å  
706 Resolution. *Plant Physiol.* **111**, 73–92 (1996).
- 707 32. Ferrari, S., Vairo, D., Ausubel, F. M., Cervone, F. & De Lorenzo, G. Tandemly  
708 duplicated *Arabidopsis* genes that encode polygalacturonase-inhibiting proteins are  
709 regulated coordinately by different signal transduction pathways in response to fungal  
710 infection. *Plant Cell* **15**, 93–106 (2003).

- 711 33. Mercadante, D., Melton, L. D., Jameson, G. B., Williams, M. A. K. & De Simone, A.  
712 Substrate dynamics in enzyme action: Rotations of monosaccharide subunits in the  
713 binding groove are essential for pectin methylesterase processivity. *Biophys. J.* **104**,  
714 1731–1739 (2013).
- 715 34. Mercadante, D., Melton, L. D., Jameson, G. B. & Williams, M. A. K. Processive pectin  
716 methylesterases: The role of electrostatic potential, breathing motions and bond  
717 cleavage in the rectification of brownian motions. *PLoS One* **9**, 1–11 (2014).
- 718 35. Kamiya, M. *et al.* Control of root cap maturation and cell detachment by BEARSKIN  
719 transcription factors in Arabidopsis. *Development* **143**, 4063–4072 (2016).
- 720 36. Kumar, S., Stecher, G., Li, M., Knyaz, C. & Tamura, K. MEGA X: Molecular  
721 Evolutionary Genetics Analysis across Computing Platforms. *Mol. Biol. Evol.* **35**,  
722 1547–1549 (2018).
- 723 37. Safran, J. *et al.* New insights into the specificity and processivity of two novel  
724 pectinases from *Verticillium dahliae*. *Int. J. Biol. Macromol.* **176**, 165–176 (2021).
- 725 38. Sénéchal, F. *et al.* Structural and dynamical characterization of the pH-dependence of  
726 the pectin methylesterase-pectin methylesterase inhibitor complex. *J. Biol. Chem.* **292**,  
727 21538–21547 (2017).
- 728 39. Kabsch, W. Integration, scaling, space-group assignment and post-refinement. *Acta*  
729 *Crystallogr. Sect. D Biol. Crystallogr.* **66**, 133–144 (2010).
- 730 40. Kabsch, W. Xds. *Acta Crystallogr. D. Biol. Crystallogr.* **66**, 125–32 (2010).
- 731 41. Zhang, Y. I-TASSER server for protein 3D structure prediction. *BMC Bioinformatics*  
732 **9**, 1–8 (2008).
- 733 42. Mirdita, M. *et al.* ColabFold - Making protein folding accessible to all. *bioRxiv*  
734 2021.08.15.456425 (2022).
- 735 43. McCoy, A. J. *et al.* Phaser crystallographic software. *J. Appl. Crystallogr.* **40**, 658–674  
736 (2007).
- 737 44. Liebschner, D. *et al.* Macromolecular structure determination using X-rays, neutrons  
738 and electrons: Recent developments in Phenix. *Acta Crystallogr. Sect. D Struct. Biol.*  
739 **75**, 861–877 (2019).

- 740 45. Emsley, P., Lohkamp, B., Scott, W. G. & Cowtan, K. Features and development of  
741 Coot. *Acta Crystallogr. Sect. D Biol. Crystallogr.* **66**, 486–501 (2010).
- 742 46. Pettersen, E. F. *et al.* UCSF Chimera--A visualization system for exploratory research  
743 and analysis. *J. Comput. Chem.* **25**, 1605–1612 (2004).
- 744 47. The PyMOL Molecular Graphics System. Version 2.0 Schrödinger, LLC.
- 745 48. Lindorff-Larsen, K. *et al.* Improved side-chain torsion potentials for the Amber ff99SB  
746 protein force field. *Proteins Struct. Funct. Bioinforma.* **78**, 1950–1958 (2010).
- 747 49. Jorgensen, W. L., Chandrasekhar, J., Madura, J. D., Impey, R. W. & Klein, M. L.  
748 Comparison of simple potential functions for simulating liquid water. *J. Chem. Phys.*  
749 **79**, 926–935 (1983).
- 750 50. Berendsen, H. J. C., Postma, J. P. M., Van Gunsteren, W. F., Dinola, A. & Haak, J. R.  
751 Molecular dynamics with coupling to an external bath. *J. Chem. Phys.* **81**, 3684–3690  
752 (1984).
- 753 51. Rowlinson, J. S. The Maxwell-boltzmann distribution. *Mol. Phys.* **103**, 2821–2828  
754 (2005).
- 755 52. Parrinello, M. & Rahman, A. Polymorphic transitions in single crystals: A new  
756 molecular dynamics method. *J. Appl. Phys.* **52**, 7182–7190 (1981).
- 757 53. Darden, T., York, D. & Pedersen, L. Particle mesh Ewald: An N·log(N) method for  
758 Ewald sums in large systems. *J. Chem. Phys.* **98**, 10089–10092 (1993).
- 759 54. Van Der Spoel, D. *et al.* GROMACS: Fast, flexible, and free. *J. Comput. Chem.* **26**,  
760 1701–1718 (2005).
- 761 55. Kluyver, T. *et al.* Jupyter Notebooks—a publishing format for reproducible  
762 computational workflows. *Position. Power Acad. Publ. Play. Agents Agendas - Proc.*  
763 *20th Int. Conf. Electron. Publ. ELPUB 2016* 87–90 (2016) doi:10.3233/978-1-61499-  
764 649-1-87.
- 765 56. Hunter, J. D. Matplotlib: A 2D graphics environment. *Comput. Sci. Eng.* **9**, 90–95  
766 (2007).
- 767 57. Humphrey, W., Dalke, A. & Schulten, K. VMD: Visual Molecular Dynamics. *J. Mol.*  
768 *Graph.* **14**, 33–38 (1996).

- 769 58. Søndergaard, C. R., Olsson, M. H. M., Rostkowski, M. & Jensen, J. H. Improved  
770 treatment of ligands and coupling effects in empirical calculation and rationalization of  
771 p K a values. *J. Chem. Theory Comput.* **7**, 2284–2295 (2011).
- 772 59. Dolinsky, T. J., Nielsen, J. E., McCammon, J. A. & Baker, N. A. PDB2PQR: An  
773 automated pipeline for the setup of Poisson-Boltzmann electrostatics calculations.  
774 *Nucleic Acids Res.* **32**, 665–667 (2004).
- 775 60. Irani, A. H., Mercadante, D. & Williams, M. A. K. On the electrophoretic mobilities of  
776 partially charged oligosaccharides as a function of charge patterning and degree of  
777 polymerization. *Electrophoresis* **39**, 1497–1503 (2018).
- 778 61. Jurrus, E. *et al.* Improvements to the APBS biomolecular solvation software suite.  
779 *Protein Sci.* **27**, 112–128 (2018).
- 780 62. Murashige, T. & Skoog, F. A Revised Medium for Rapid Growth and Bio Assays with  
781 Tobacco Tissue Cultures. *Physiol. Plant.* **15**, 473–497 (1962).
- 782

| Characteristics                          | PGLR                 | ADPG2                                          |
|------------------------------------------|----------------------|------------------------------------------------|
| Data collection                          |                      |                                                |
| Diffraction source                       | PROXIMA1A            | PROXIMA1A                                      |
| Wavelength (Å)                           | 0.978                | 0.978                                          |
| Temperature (°C)                         | 100.15               | 100.15                                         |
| Detector                                 | PILATUS3 6M          | EIGER 16M                                      |
| Crystal to detector distance (mm)        | 190.0                | 279.3                                          |
| Rotation range per image (°)             | 0.1                  | 0.1                                            |
| Total rotation range (°)                 | 360                  | 360                                            |
| Crystal data                             |                      |                                                |
| Space group                              | P1                   | P 2 <sub>1</sub> 2 <sub>1</sub> 2 <sub>1</sub> |
| <i>a</i> , <i>b</i> , <i>c</i> (Å)       | 38.97, 41.83, 63.33  | 71.78, 88.56, 113.87                           |
| $\alpha$ , $\beta$ , $\gamma$ (°)        | 93.25, 99.86, 114.95 | 90.00, 90.00, 90.00                            |
| Subunits per asymmetric unit             | 1                    | 2                                              |
| Data statistics                          |                      |                                                |
| Resolution range (Å)                     | 33.33 - 1.3          | 44.61 - 2.03                                   |
| Total No. of reflection                  | 761821 (55201)       | 645204 (65696)                                 |
| No. of unique reflection                 | 83668 (8043)         | 47381 (4654)                                   |
| No. of reflections, test set             | 4182 (401)           | 2368 (233)                                     |
| R <sub>merge</sub> (%)                   | 7.64 (77.7)          | 8.9 (97)                                       |
| Completeness (%)                         | 96.1 (92.0)          | 99.9 (99.3)                                    |
| ( <i>I</i> /σ( <i>I</i> ))               | 16.24 (2.78)         | 16.91 (2.56)                                   |
| Multiplicity                             | 9.1(6.9)             | 13.6 (14.0)                                    |
| CC <sub>1/2</sub> (%)                    | 99 (86.3)            | 99 (92.1)                                      |
| Refinement                               |                      |                                                |
| R <sub>crys</sub> /R <sub>free</sub> (%) | 14.2 / 17.7          | 18.9 / 23.0                                    |
| Average B - factor (Å <sup>2</sup> )     | 29.1                 | 27.89                                          |
| No. of non-H atoms                       |                      |                                                |
| Protein                                  | 3085                 | 5563                                           |
| Ion                                      | -                    | 5                                              |
| Ligand                                   | 100                  | -                                              |
| Water                                    | 609                  | 999                                            |
| Total                                    | 3794                 | 6567                                           |
| R.m.s. deviations                        |                      |                                                |
| Bonds (Å)                                | 0.015                | 0.006                                          |
| Angles (°)                               | 1.59                 | 1.06                                           |
| Ramachandran plot                        |                      |                                                |
| Most favoured (%)                        | 94.6                 | 93.58                                          |
| Allowed (%)                              | 5.4                  | 6.28                                           |
| Outlier (%)                              | -                    | 0.14                                           |

**Table 1.** Data collection, processing and refinement statistics for PGLR and ADPG2. Statistics for the highest-resolution shell are shown in parentheses.



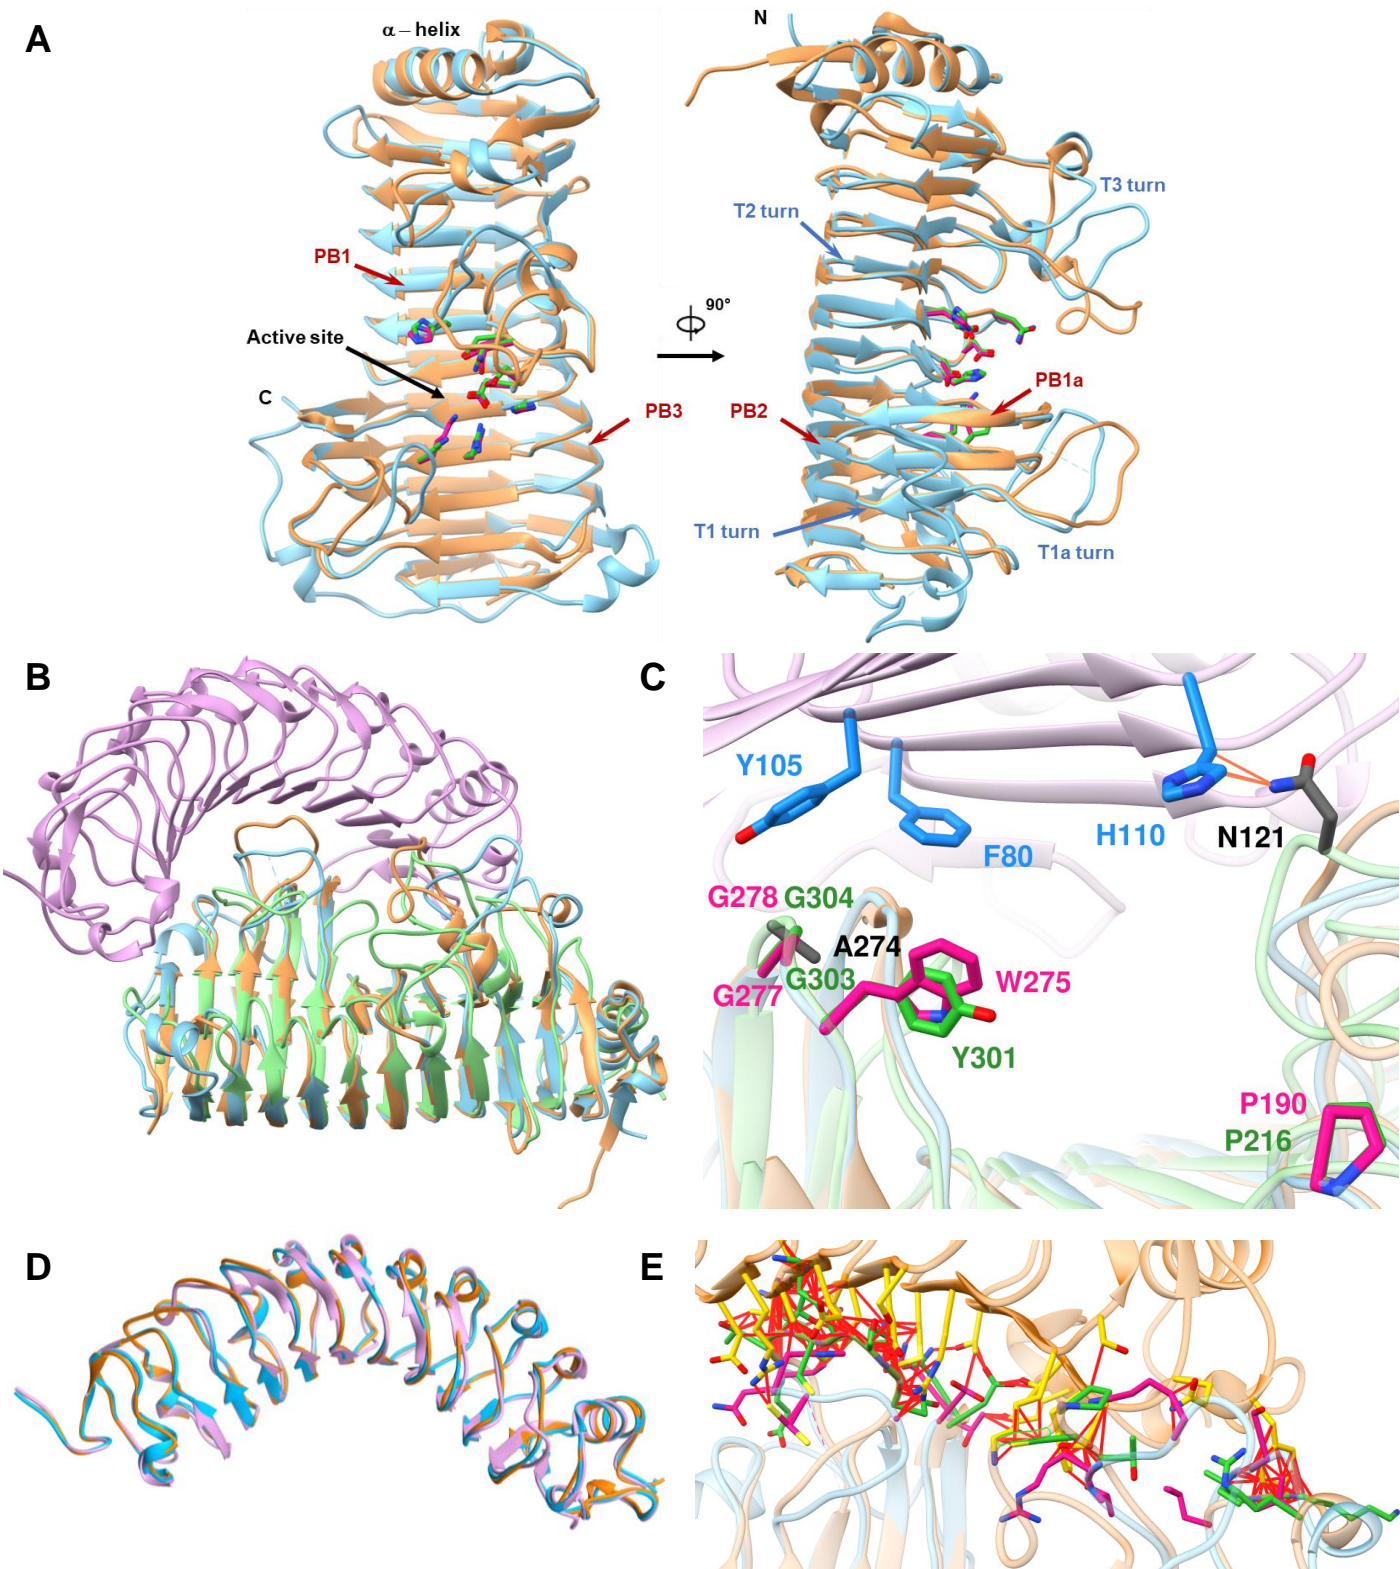

**Fig 1. Structure comparison of PGLR and ADPG2 and identification of novel amino-acids required for activity**  
 A) Overall structure of PGLR and ADPG2 represented in ribbon diagrams which are colored in blue and brown, respectively. Right-handed parallel  $\beta$ -helical structure consisting of  $\beta$ -strands (red) and turns (blue). PGLR and ADPG2 active site amino acids are pink and green colored.  $\beta$ -sheets are turns are indicated by red and blue arrows. B) Ribbon representation of *Phaseolus vulgaris* PGIP2 (PvPGIP2, plum), PGLR (blue), ADPG2 (brown), *Fusarium phyllophilum* PG (FpPG1, green). C) Detailed representation of aa involved in PvPGIP2-FpPG1 interaction (PvPGIP2 amino-acids in blue and FpPG1 amino-acids in grey), with orange lines representing van der Waals contacts. Key aa (N121, A274) mediating the interaction in FpPG1 are absent in PGLR and ADPG2. D) Superimposition of crystallised PvPGIP2 with models of Arabidopsis PGIP1 (AtPGIP1, orange) and PGIP2 (AtPGIP2, blue). E) Interactions of AtPGIP1 with PGLR and ADPG2. Amino acids of AtPGIP1 (yellow), PGLR (pink) and ADPG2 (green) included in clashes closer than 0.6 Å are shown. The red lines represent atoms overlap of minimum 0.6 Å.



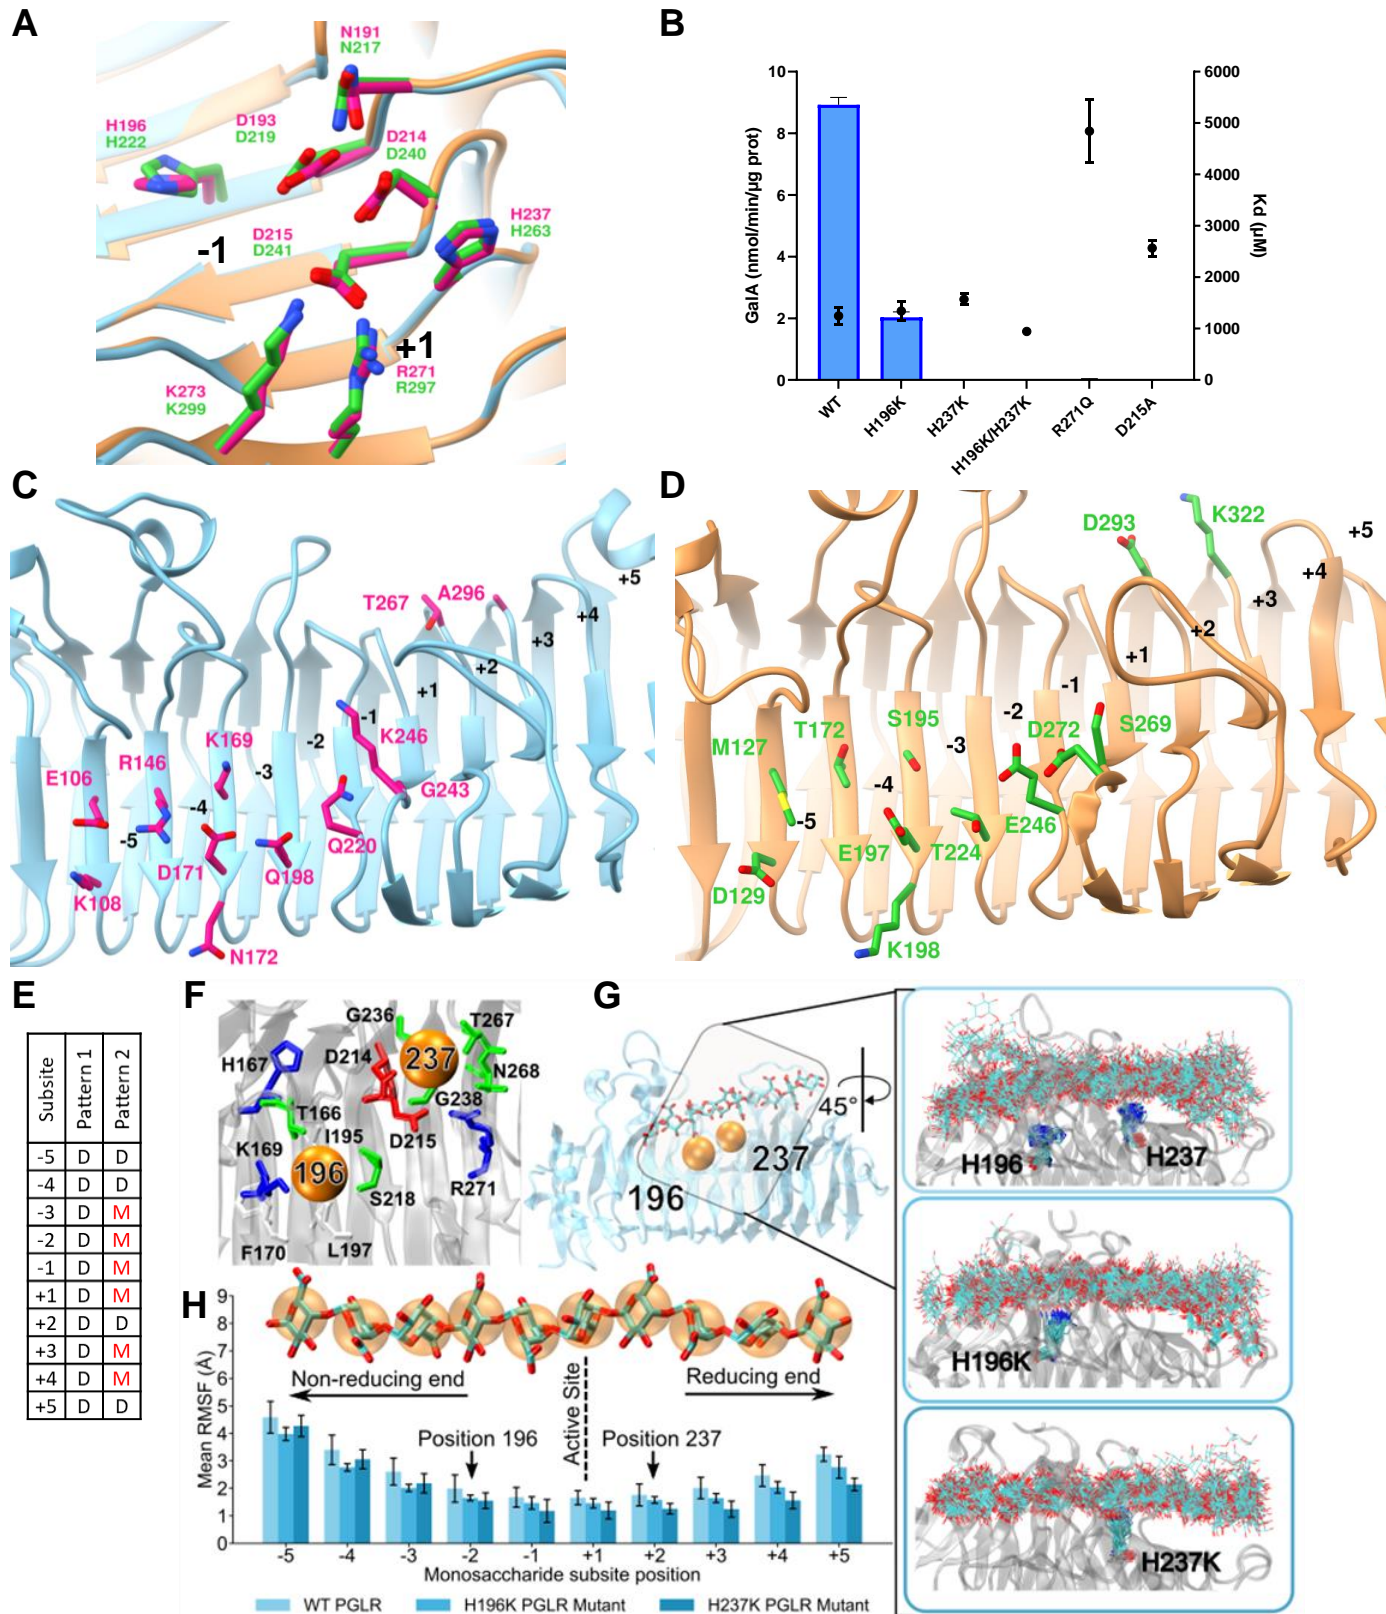

**Figure 2: Structure of the PGLR-ADPG2 active site and binding groove. Role of H196 and 237 for PG activity**

A) Active site of the PGLR and ADPG2 highlighting absolutely conserved aa. D193, D214 and D215 are aa involved in substrate hydrolysis. Black numbers indicate the subsites. B) Total PG activity of WT and mutated forms of PGLR (H196K, H237K, H196K/H237K, R271Q, D217A) on PGA (blue bars) and MST analysis of the interaction between WT and mutated forms of PGLR using a substrate of DP12 and DM5 (black dots). C) Structure of PGLR binding groove (subsite -5 to +5). D) Structure of ADPG2 binding groove (subsites -5 to +5). E) Sequence of the fully de-methylesterified (pattern 1) or 60% methylesterified (pattern 2) deca-saccharides simulated in complex with ADPG2 and PGLR. D: de-methylesterified GalA, M: methylesterified GalA. F) cross-section of the substrate binding groove highlighting the positions of H196 and H237, which are represented as orange spheres. Positively and negatively charged residues are shown in blue and red, respectively, while polar residues are shown in green and represented as sticks. G) PGLR in complex with a deca-saccharides substrate, in the insets the conformational ensembles of the substrate and of H196, H237 and H196/H237 are shown, by reporting conformations obtained every 10 ns. H) Root mean square fluctuations (RMSF) of each monosaccharide across the binding groove for WT PGLR and its mutants.

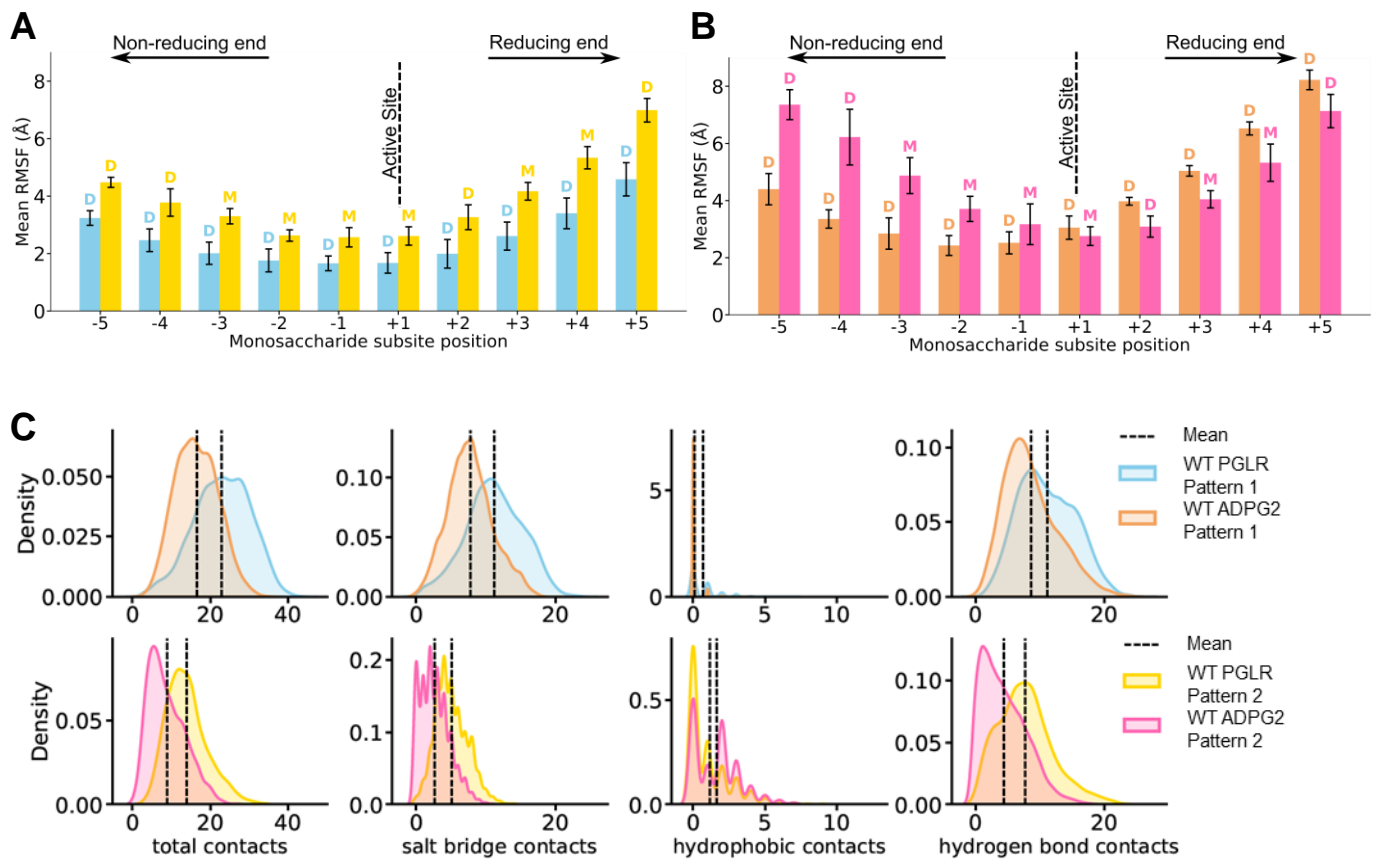

**Fig 3. PGLR and ADPG2 show distinct substrate dynamics.**

A-B) Root mean square fluctuations (RMSF) of each monosaccharide bound across the binding groove of PGLR (A) or ADPG2 (B). In each panel, fully de-methylesterified (pattern 1 – cyan in A and orange in B) or 60% methylesterified deca-saccharides (pattern 2 – yellow in A and pink in B) are shown. C) Analysis of the contacts between PGLR or ADPG2 and substrates either fully de-methylesterified (pattern 1) or characterized by 60% methylesterification (pattern 2).

| Substrate | PGLR                    |      |                                                  |     |                                       |     | ADPG2                   |     |                                                  |      |                                       |     |
|-----------|-------------------------|------|--------------------------------------------------|-----|---------------------------------------|-----|-------------------------|-----|--------------------------------------------------|------|---------------------------------------|-----|
|           | $K_D$ ( $\mu\text{M}$ ) |      | $k_{\text{on}}$ ( $\text{M}^{-1}\text{s}^{-1}$ ) |     | $k_{\text{off}}$ ( $\text{ms}^{-1}$ ) |     | $K_D$ ( $\mu\text{M}$ ) |     | $k_{\text{on}}$ ( $\text{M}^{-1}\text{s}^{-1}$ ) |      | $k_{\text{off}}$ ( $\text{ms}^{-1}$ ) |     |
|           | mean                    | SD   | mean                                             | SD  | mean                                  | SD  | mean                    | SD  | mean                                             | SD   | mean                                  | SD  |
| PGA       | 8.12                    | 0.68 | 1320                                             | 110 | 10.7                                  | 0.2 | 4.3                     | 1.1 | 1120                                             | 230  | 4.8                                   | 0.8 |
| DM30      | 12.1                    | 2.2  | 1010                                             | 180 | 12.2                                  | 0.4 | 194                     | 89  | 62.8                                             | 28.6 | 12.2                                  | 0.3 |
| DP12DM5   | 12.6                    | 1    | 953                                              | 71  | 12                                    | 0.3 | 10.7                    | 0.9 | 833                                              | 64   | 8.9                                   | 0.3 |
| DP12DM30  | 26.8                    | 3.6  | 268                                              | 23  | 7.2                                   | 0.7 | 267                     | 79  | 28.8                                             | 7.8  | 7.7                                   | 0.9 |
| DP12DM60  | 38                      | 7.4  | 196                                              | 29  | 7.5                                   | 0.9 | 155                     | 47  | 54.9                                             | 16.0 | 8.5                                   | 0.7 |

**Table 2.  $k_{\text{on}}$ ,  $k_{\text{off}}$  and  $k_D$  measurements for PGLR and ADPG using substrates of various degrees of polymerization.** PGA: Polygalacturonic acid, DM30: Commercial pectins of DM30%, DP12DM5/DP12DM30/DP12DM60: Pool of OG centered on DP12 with increasing DM (5%, 30%, 60%). Data shown average of three replicates.

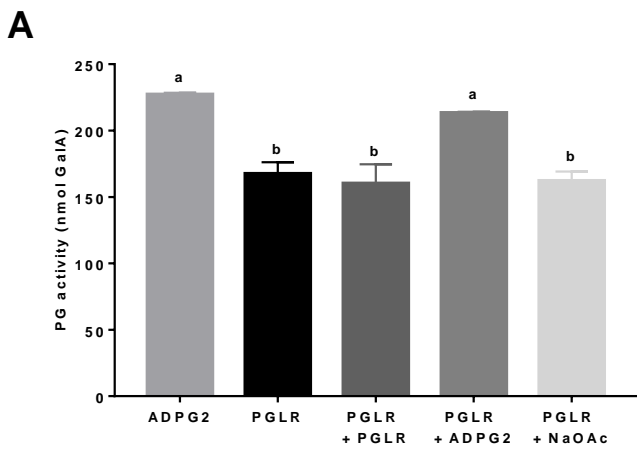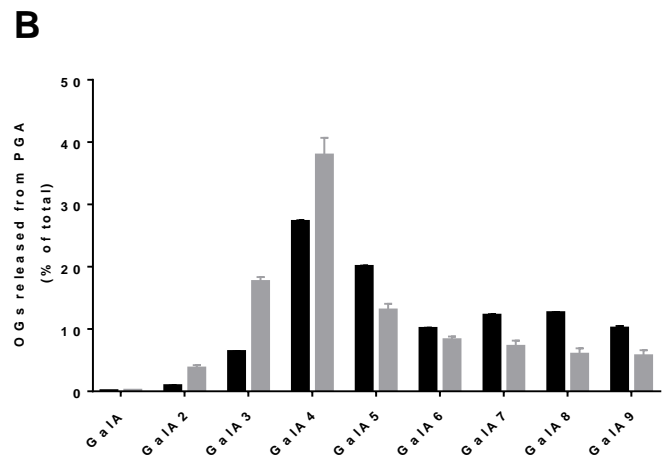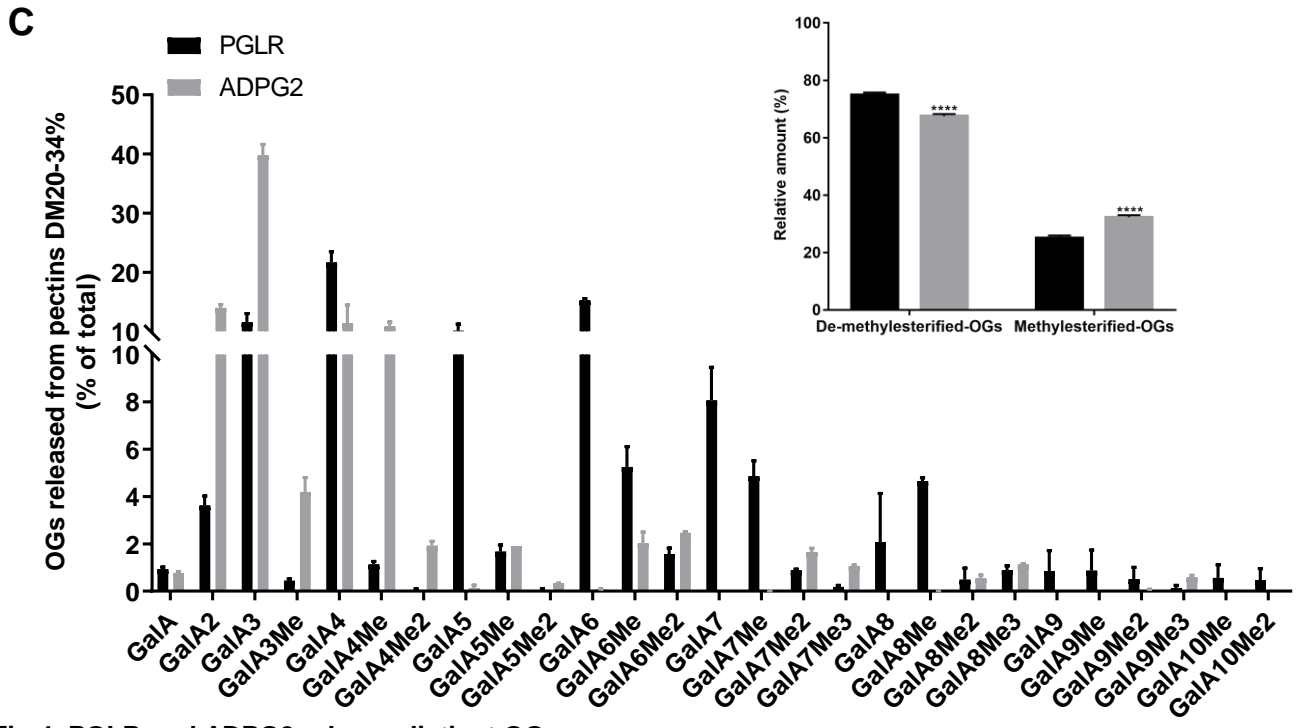

**Fig 4. PGLR and ADPG2 release distinct OGs.**  
 A) Activity tests performed on PGA (DM 0) after 1 hour digestion by ADPG2, PGLR and by adding PGLR or ADPG2 for 1 hour after a first digestion by PGLR. NaOAc (sodium acetate): negative control. B) Oligoprofiling of OGs released after 1 hour digestion of PGA by PGLR (black) or ADPG2 (grey) at 40°C, pH 5.2. C) Oligoprofiling of OGs after overnight digestion of pectins DM 20-34% by PGLR (black) or ADPG2 (grey) at 40°C, pH 5.2. Inset: Cumulative OGs released by PGLR and ADPG2 after over-night digestion on pectins DM 20-34% at 40°C, pH 5.2. Two-way ANOVA with Sidask's multiple comparison test, P value \*\*\*\*<0.0001.

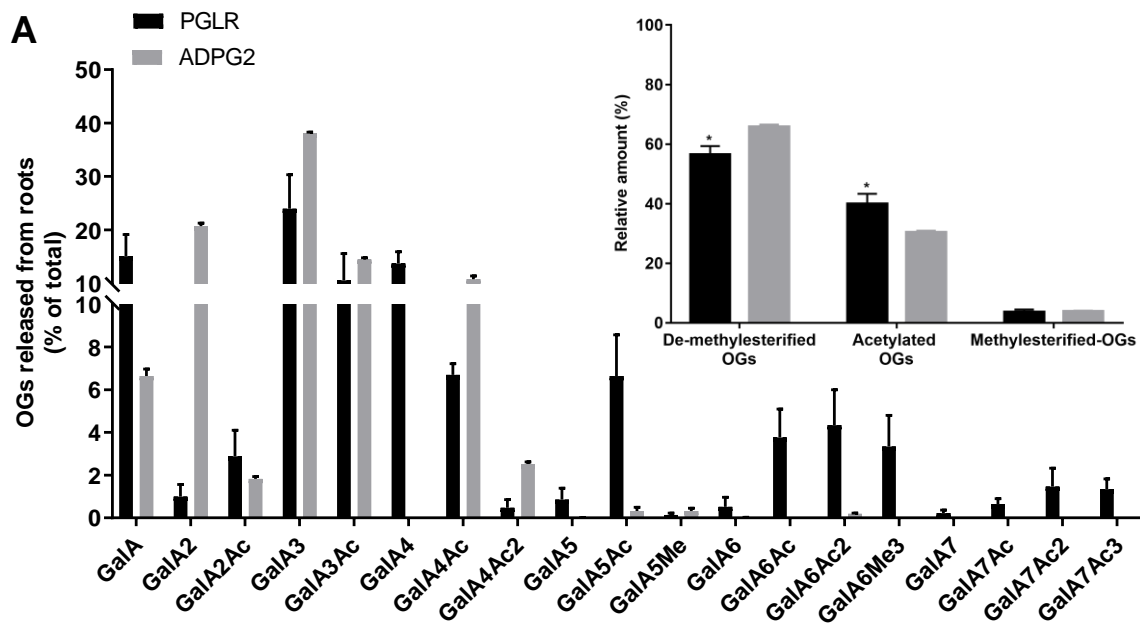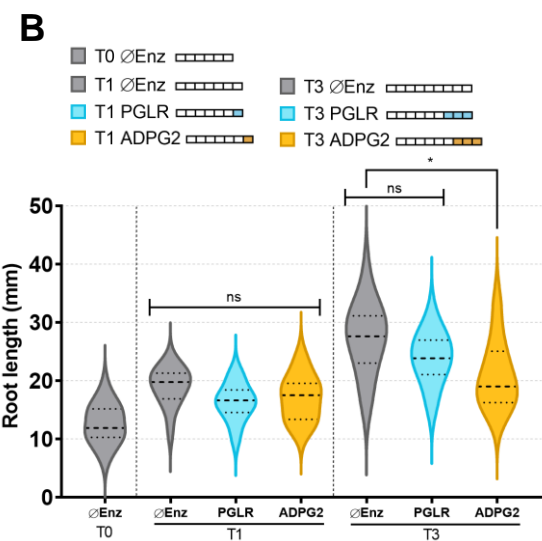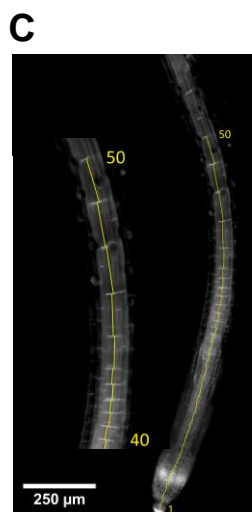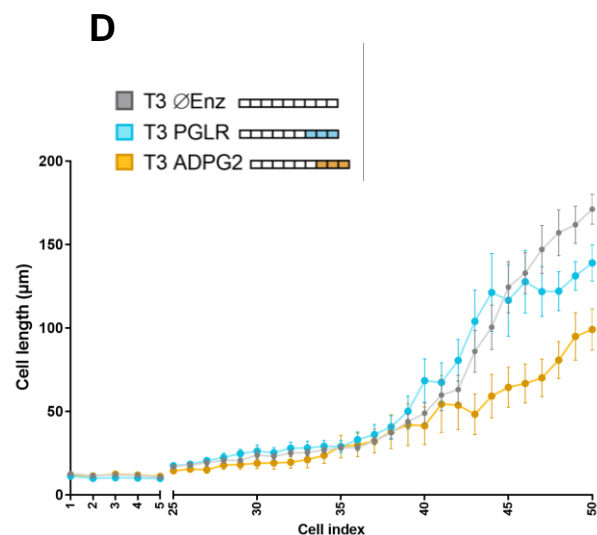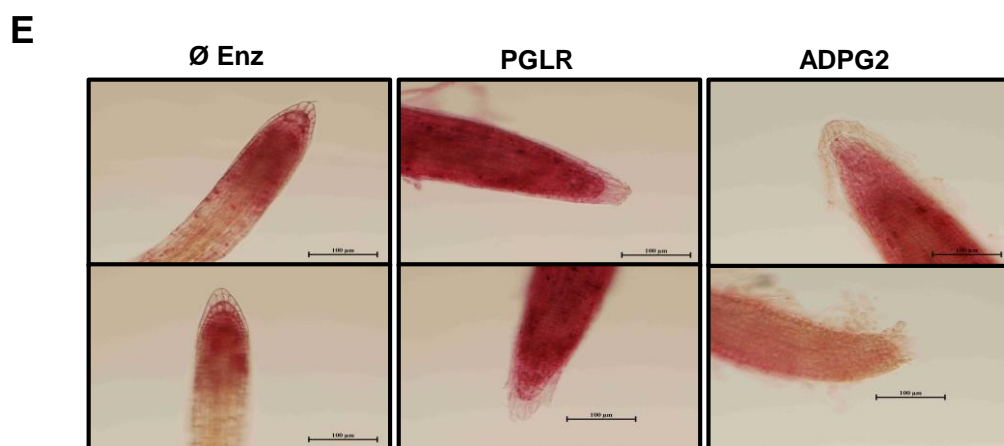

**Fig 5. PGLR and ADPG2 are active on roots pectins and have distinct effects of root length**

A) Oligoprofiling of OGs after digestion of roots cell wall by PGLR (black) and ADPG2 (grey) at 40°C, pH 5.2 after over-night digestion, (Inset: Cumulative OGs released by PGLR (black) and ADPG2 (grey) after over-night digestion of roots cell walls at 40°C, pH 5.2). Two-way ANOVA with Sidak's multiple comparison test, P value \*0.0290. B) Effects of the exogenous application of PGLR and ADPG2 on total root length of Arabidopsis seedlings. PGLR and ADPG2 were applied at iso-activities for one or three days on 6-day-old seedlings grown in liquid media. C) Root cell numbering using EGFP-LTI6b reporter lines. D) Effects of 3-day exogenous application of PGLR and ADPG2 on the cell length of the first 50 roots cells of 7-day-old seedlings. E) Effects of 3-day exogenous application of PGLR and ADPG2 on root cap structure of 7-day-old seedlings (2 representative images per condition). Scale bar represents 100 µm.

**A**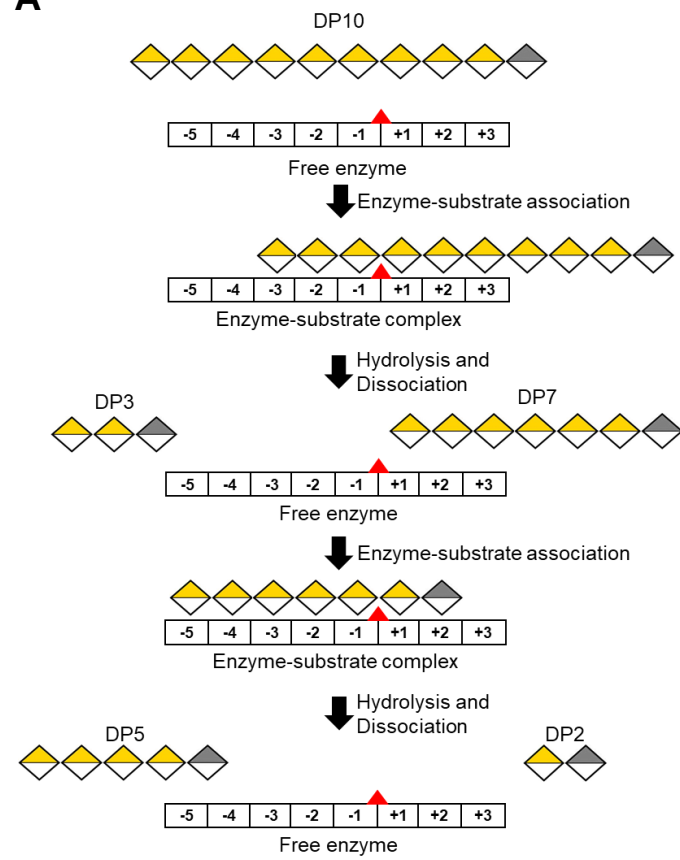**B**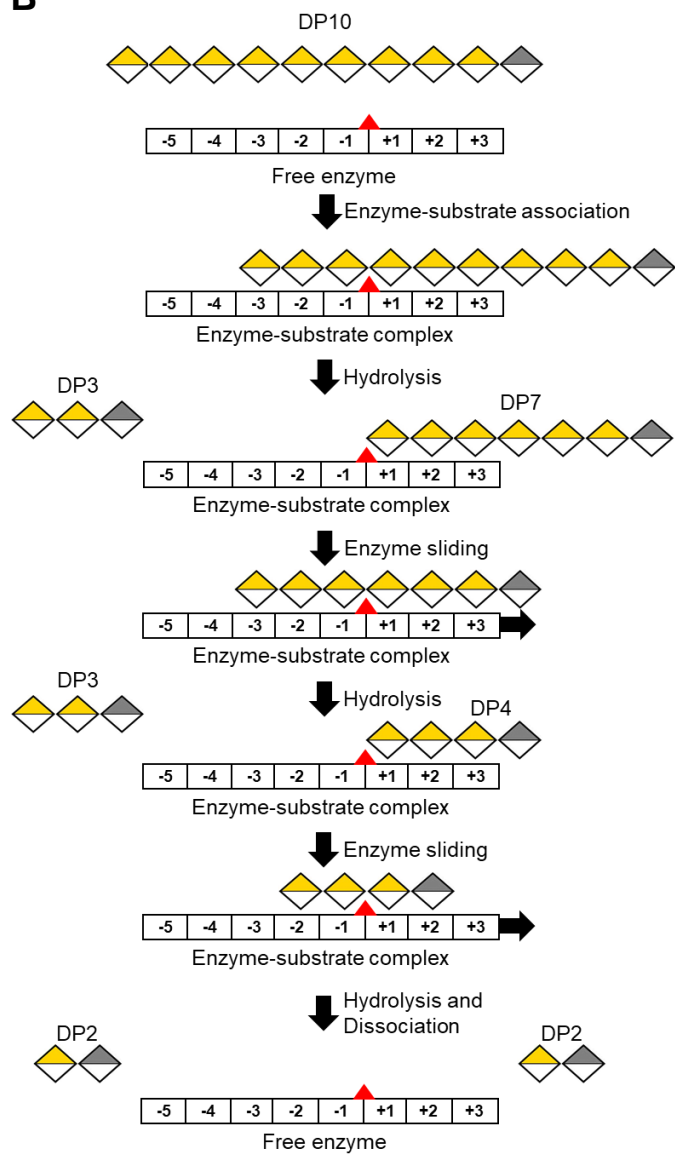

**Fig 6. Model of PGLR and ADPG2 processivity**

A) PGLR shows low processive dynamics where enzyme-substrate association is followed by hydrolysis and dissociation of the substrate from the enzyme. This low processivity produce OGs of variable DPs. B) ADPG2 sliding motion after forming enzyme-substrate complex allows multiple substrate hydrolysis while staying attached to the substrate showing highly processive dynamics. Processive enzymes can produce small DP OGs. Galacturonic acid are yellow colored. Galacturonic acid reducing end is grey colored. PG subsites are indicated by numbers. Red triangle represents the hydrolysis site.



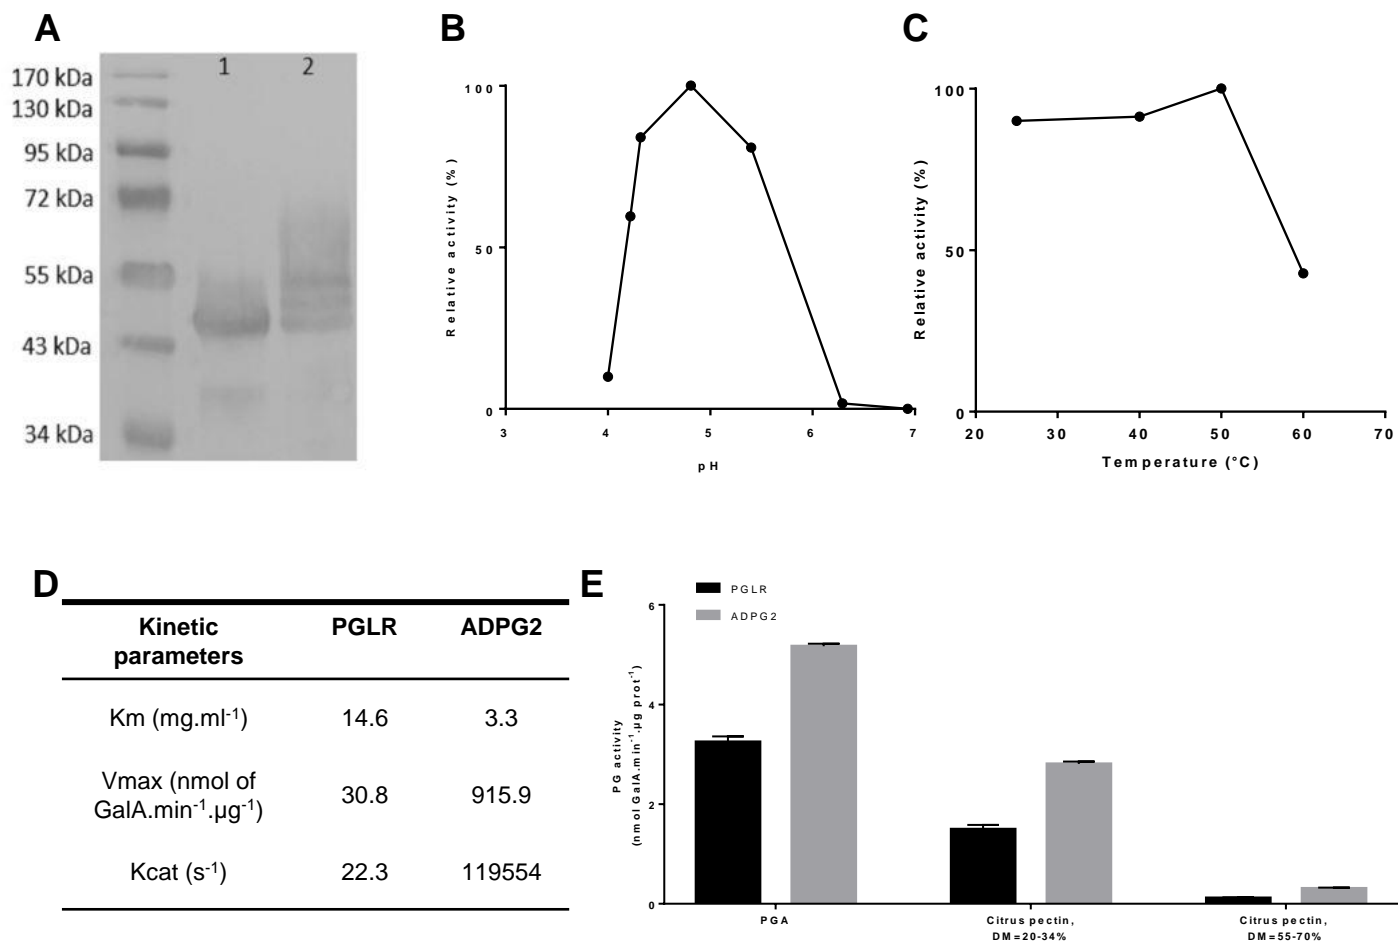

### Extended Data Fig 1: Purification and biochemical characterization of ADPG2

A) Western blot analysis of ADPG2 with anti-His antibodies on de-glycosylated form of ADPG2 obtained after digestion by PNGase F (1) and non-digested native sample (2). B) pH-dependence of ADPG2 activity. The activities were measured after 1 hour of incubation with PGA at 25°C at various pHs. C) Temperature-dependence of ADPG2 activity. The activities were measured after 1 hour of incubation with PGA at pH 5.2 at various temperature. D) Determination of Km, Vmax and Kcat for ADPG2 and PGLR. Activity was assessed using various concentrations of polygalacturonic acid (PGA) at 25°C and pH 5.2 using the 3,5-dinitrosalicylic acid method. E) Substrate specificity of PGLR and ADPG2. Activity was measured at 50°C and pH 5.2 during 1 hour using substrates of increasing degrees of methylesterification.

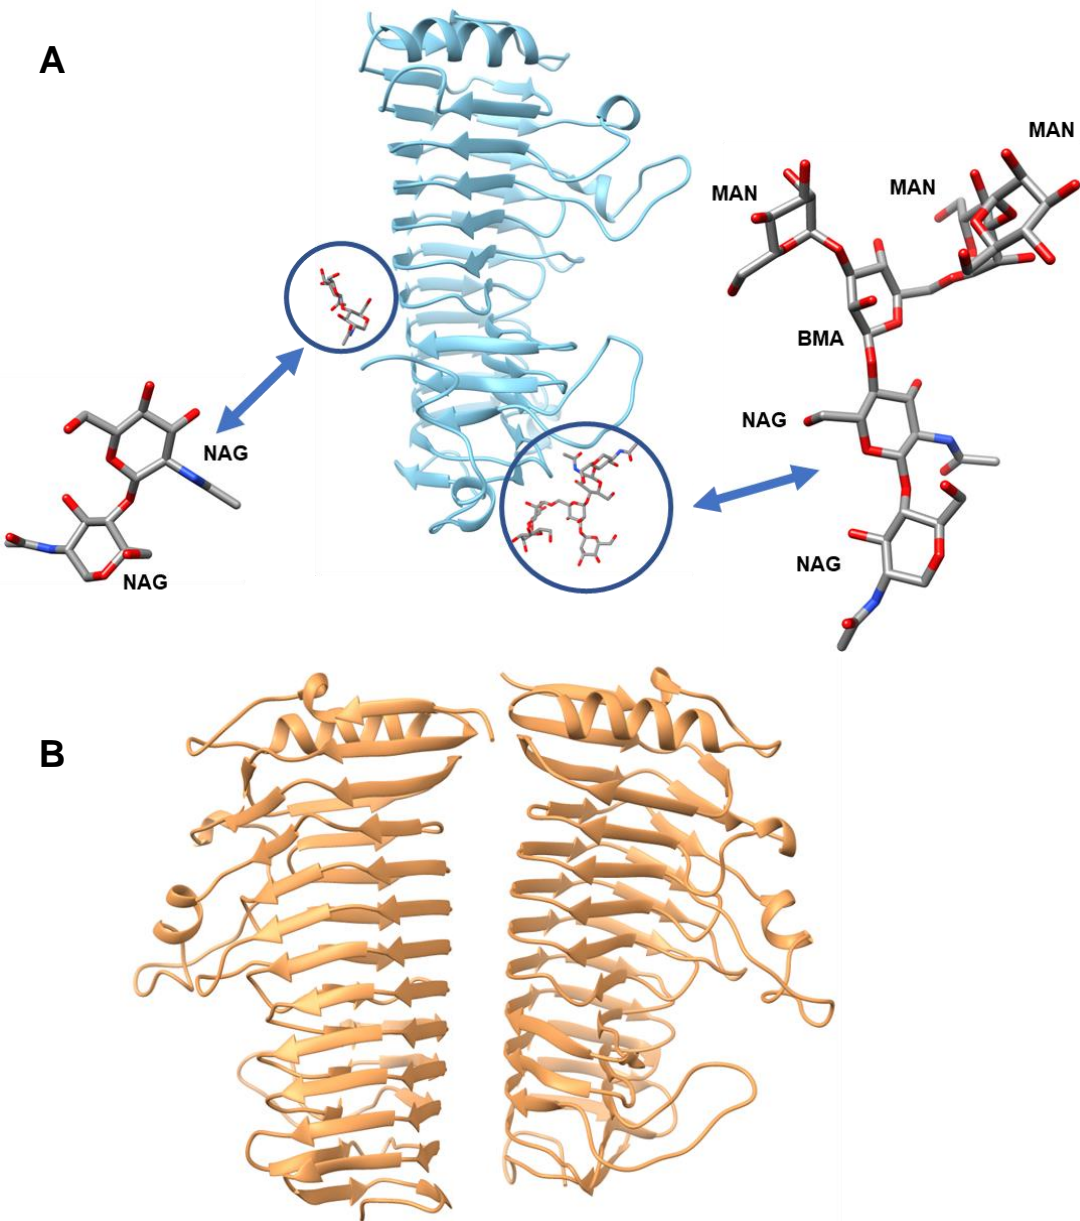

**Extended Data Fig 2. Crystallised PGLR and ADPG2 in asymmetric unit and glycosylation sites**

A) Ribbon diagram of the PGLR structure containing 1 molecule in the asymmetric unit. PGLR harboured two N-glycosylation sites: Asn255- linked NAG-NAG and Asn313-linked NAG-NAG-BMA-MAN-MAN-MAN. NAG; N-acetylglucosamine, BMA; β-mannose, MAN α-mannose. B) Ribbon diagram of the ADPG2 structure containing 2 molecules in the asymmetric unit.

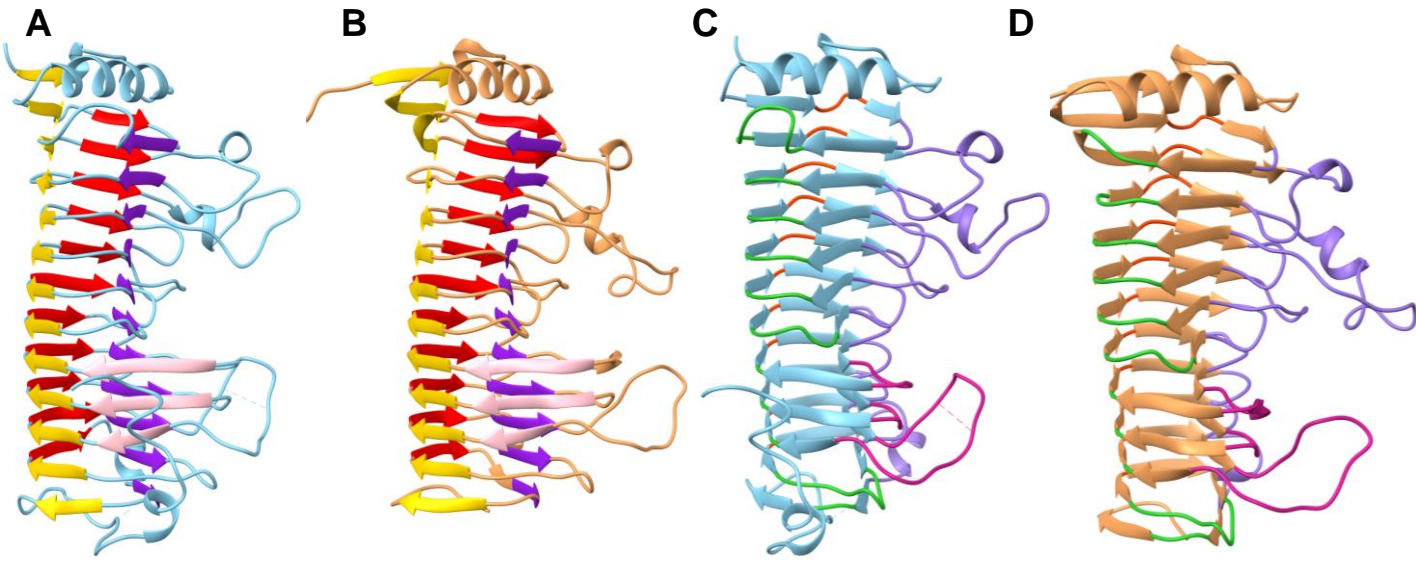

**Extended Data Fig 3. PGLR and ADPG2 represent right-handed parallel  $\beta$ -helical structure**

Ribbon structure representing  $\beta$ -sheets (PB1-purple, PB1a-pink, PB2-yellow and PB3-red) for PGLR (A) and ADPG2 (B). Ribbon structure representing T-turns (T1-lime green, T1a-violet red, T2- orange red, T3 medium purple) for PGLR (C) and for ADPG2 (D).  $\beta$ -strands and T-turns are named according to Petersen et al. 1997

**A**

|        |                                                                  |     |
|--------|------------------------------------------------------------------|-----|
| CpPG1  | -----ATCTVKS-----                                                | 8   |
| FpPG1  | -----DPCSVTEY-----S-----                                         | 9   |
| AnPGII | -----MHSFASLLAYGLV-----AGATFASASPIEARDSCTFTTA-----A-----         | 36  |
| AaPG1  | -----ATCTFSGSNGAS-----                                           | 13  |
| AnPG1  | -----STCTFTSA-----S-----                                         | 9   |
| PcPG1  | -----SDSRVTEPKTPSSCTTL-----KADSS-TAT                             | 26  |
| PGLR   | -----RYSVYV-----KGNRRS-1AEGGSSGTINWLDHGAKGDSDDT                  | 38  |
| ADPG2  | SRISPNWYDHSYKRFKSDSLIKRRREDITGLRSFVRASLRTP TVSVSDFGAKGDGKTDOT    | 60  |
|        |                                                                  |     |
| CpPG1  | --DDAKDIAGCSAVTLNGFTVPAGNTLVLPN-DKGATV-----M--AGDITF-----        | 51  |
| FpPG1  | --GLATAVSSCKNIVLNGFQVP TGKQLDLSLQNDSTV-----F--KGTTF-----         | 53  |
| AnPGII | --AAKAGKAKCSTITLNNIEVPAGTLDLTLGLSGTKVI-----F--EGTTF-----         | 80  |
| AaPG1  | --SASKSKTSCSITLVNSVAVPSGTTLDLTKLNDGTHVI-----F--SGETTF-----       | 57  |
| AnPG1  | --EASESSCSDDVLSIEVPAGETLDLSDAAGSTI-----F--EGTTF-----             | 53  |
| PcPG1  | S-TIQKALNCDQKAVRLSAGTSVFLSGPLSLPSGVS---LLIDKGVTLRAVNNAKSF        | 90  |
| PGLR   | KAFEDAHWQACKVA-ASTLLVPSGTFVLGVPVFLGKCEKEIVFQLEKGIIA-----         | 98  |
| ADPG2  | QAFVNAWKKACCSNGAVNLVLPKGNITLTKSIQLTG-PCNSILTVQIFGLTSA-----       | 112 |
|        |                                                                  |     |
| CpPG1  | -----AKTTL-DGPL--FT-IDGTGIN-----FVGA-DHIFDNGALYWDGKGTNN          | 92  |
| FpPG1  | -----ATTADNDFNP--IV-ISGSNIT-----ITGASGHVLDGNGQAYWDGKGSNS         | 96  |
| AnPGII | -----QYEEN-AGPL--IS-MSGEHIT-----VTGASGHLINCDGARWWDGKGTNS         | 121 |
| AaPG1  | -----GYKEN-SGPL--IS-VSGDILT-----ITGASGHSINGDGSRWWDGEGGNS         | 99  |
| AnPG1  | -----GYKEN-KGPL--IR-FGGKDLT-----VTMADGAVLDGDSRWWDKGTNG           | 95  |
| PcPG1  | ENAPSSCGVVDKNGKCDFAITAVSTINSGIYGPITDGGGVKLLQDKVSHWLEAADAK        | 142 |
| PGLR   | ---PT---SASANGSLQWIEFKALQGIT-----IKG--KGIIDGRGSVWHDMMGTK         | 136 |
| ADPG2  | ---SQ---KRSDY-KDISKWIIFDGVNLS-----VDGDTGVVDGNGETHWQNSCKRN        | 159 |
|        |                                                                  |     |
| CpPG1  | GT--HKPHFLK---IKGSGTYKKFEVLNSPAQAI SVGPTDAHLTLDGITVDVDFAGDTK-    | 146 |
| FpPG1  | NS-NQKPDHFIVVQKTTGNISKITNLNIQMPVHCFDITGSS-QLTISGLLIDNRAGDKPN     | 154 |
| AnPGII | GK--KKPKFFY--AHGLDSSSITGLNIKNTPLMAFVQAN---DITFTDVTINNADGDT--     | 173 |
| AaPG1  | --GK--TKPKFFA--AHSLTNSVISGLKIVNSPVQVFSVAGSD-VLTLKDITIDNSGDGD--   | 152 |
| AnPG1  | GK--TKPKFMY--IHVDVETDFKGINIKNTPVQAIISVQAT--NVHLNDFIDNSGDGD--     | 147 |
| PcPG1  | VKKLQKNTPRLIQINQSKNFTLVNLSLINSVNFVHFVSDGD-GFTAKNTTIK-----TP-     | 195 |
| PGLR   | ---MPTKPTALRFYGSNGVTVSGITIQNSPQTHLKFQDNCI-SIQVDFITS-----SP-      | 186 |
| ADPG2  | KAKPCTKAPTALTFYNSKSLIVKVKRVAQQIQLSIEKCS-NVQVSNVVT-----AP-        | 212 |
|        |                                                                  |     |
| CpPG1  | -----NLGHNTDG-DVSA--NNVTIQNCIVKNDGDCIAIND-----GNNIRFENNQCSG      | 193 |
| FpPG1  | AKSGSLPAAHNTDG-DISSSDHVTLDNNHVNDDCVAVTS-----GTNIWVSNMYCSG        | 208 |
| AnPGII | -----QGGHNTDAFDVNSVGVNIIKPVWVNDGCLAVNS-----GENIWF TGGT CIG       | 221 |
| AaPG1  | -----NGGHNTDAFDIGTSTYVTSIGATVYNDGCVAVNS-----GENIYFSGGYCSG        | 200 |
| AnPG1  | -----NGGHNTDAFDISESTGVYISGATVKNDDGCIANS-----GESISFTGGTCSG        | 195 |
| PcPG1  | -----STARNTDGLDPMSSKNIIAAYSNIATGDDWAIKAYKRAEIRNIIHLNDFGT         | 249 |
| PGLR   | -----GDSPTDGLHLQNSQDAVIYRSLACDDGDCISIQT-----GCSNIIHVDVCGP        | 235 |
| ADPG2  | -----ADSPNTDGLHITNTQNIIRVSESIIIGTDDGDCISIES-----GSQNVQINDITCGP   | 261 |
|        |                                                                  |     |
| CpPG1  | GHGLSISIGS IATG---KHVSNVVIKGNVTVTRSMYGVRIKQAORTATSASVSGVTDANTISG | 250 |
| FpPG1  | GHGLSISIGSVGGK-SDNVVDGQVFLSSQVNSQNGCRKXNSNSGA-TGTINNVTYQNIALTN   | 266 |
| AnPGII | GHGLSISIGSVGGR-SNNVVKNTIEHS TVSNSENNAVRIKXISGA-TGSVSEIYSNIVMSG   | 279 |
| AaPG1  | GHGLSISIGSVGR-SDNTVKNVTFVDSIINSNMGVRIKXINTIDT-TGSVSDVTKDITLTS    | 258 |
| AnPG1  | GHGLSISIGSVGR-DDNTVKNVTSISDS TVSNANGVRIKXIYKE-TGDVSEIYTSNIQLSG   | 253 |
| PcPG1  | GHGMSIGSEI-----MGVYNTVDLKMNGTTLNGLRKS DSKA-AGVNVGRYSNVVMKN       | 303 |
| PGLR   | GHGLSISIGLGDNTKACVSNITVRDVTMHEHTTNGVRIKXISWQGG-SGSVQVMFSNIQVSN   | 294 |
| ADPG2  | GHGLSISIGSLGDDNSKAFVSGVTVDGAKLSGTDNGVRIKXIYQGG-SGTASNIIFQNIQMDN  | 320 |
|        |                                                                  |     |
| CpPG1  | IAKYGVLLISQSYDD--VGNPGTGAPFSDVNF TGGATTIKVNAARTVTEC-GNC-SGN      | 306 |
| FpPG1  | ISTYGDVVDQDYLNNGPTGKPTNGVKISNIFIKVGTIV--ASSAQDWFLLC-GDGS CSG     | 323 |
| AnPGII | ISDYGVVIVQDYEDGKPTGKPTNGVTIQDVKLESVTVGSV--DSGATEIYLCC-GSGSCSD    | 336 |
| AaPG1  | IAKYGVVQDYNGDT--SSTPTTGVPTDFVLDWVHGSV--VSSGTLNLLSC-GSGSCSD       | 313 |
| AnPG1  | ITDYGVIVQDYENGSPGTPTGPIITDVTVDVGTGL--EDDATQVYLLC-GDGS CSCD       | 310 |
| PcPG1  | VAK-PIVIDTYEKEGKSNVDPD---WSDITFKDVTSETKG---VVLNGENAKKPIE         | 353 |
| PGLR   | VAN-PIIIDQYDCGGGCHNETSAVAVSNININIKGTYTK---E-PVRFACSDSLPCTG       | 349 |
| ADPG2  | VKN-PIIIDQYCDKSKCTEKSAVQVKNVYRDISGTSASE--N-AITFNCSKNYPCQG        | 376 |
|        |                                                                  |     |
| CpPG1  | WNNSQLTVTGGKAGTIKSDK-----AKITG-GQYL-----                         | 335 |
| FpPG1  | FTFSGNAITGGGKTSKCNYP-----TNTCP-S-----                            | 349 |
| AnPGII | WTWDVVKVTGGKSTACKNF-----PSVAS-C-----                             | 362 |
| AaPG1  | WTWTDVSVSGGKTSKCTNV-----PSGAS-C-----                             | 339 |
| AnPG1  | WTWSGVDLSGGKTSKCENV-----PSGAS-C-----                             | 336 |
| PcPG1  | VTMKNVKL-----T--SDSTWQIKNVVKK-----                               | 376 |
| PGLR   | ISLSTIELKPATGKASSLDPFCWKAHGLKTKTLPPIQCLKTEKSPASRSNNDAC           | 406 |
| ADPG2  | IVLDRVNIKGGKATCTNAN-----VVDKGAVLP--QCNS-----                     | 409 |

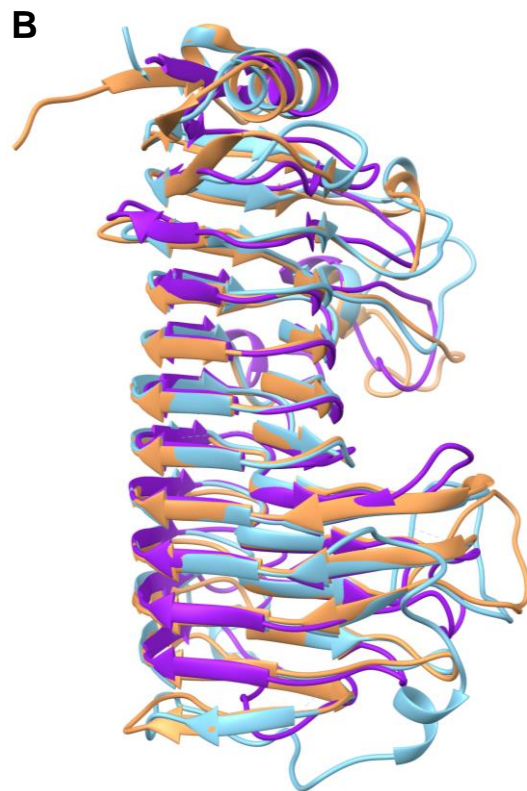

**Extended Data Fig 4. PGLR and ADPG2 sequence and structure identity with selected fungal enzymes**

A) Sequence alignment of PGLR and ADPG2 with characterized fungal PGs. Selected PGs; *Pectobacterium carotovorum* PG1 (PcPG1, PDB: 1BHE), *Aspergillus niger* PGI (AnPGI, PDB: 1NHC) and PGII (AnPGII PDB: 1CZF), *Fusarium phyllophilum* PG1 (FpPG1, 1HG8), *Aspergillus aculeatus* (AaPG1, PDB: 1IB4) and *Chondrostereum purpureum* (CpPG1, PDB: 1KCD). The aa of the active are red-boxed while the conserved aa are blue-boxed; The alignment was performed using ClustalO. B) Superimposition of PGLR, ADPG2 and AaPG1 structures<sup>11</sup>.



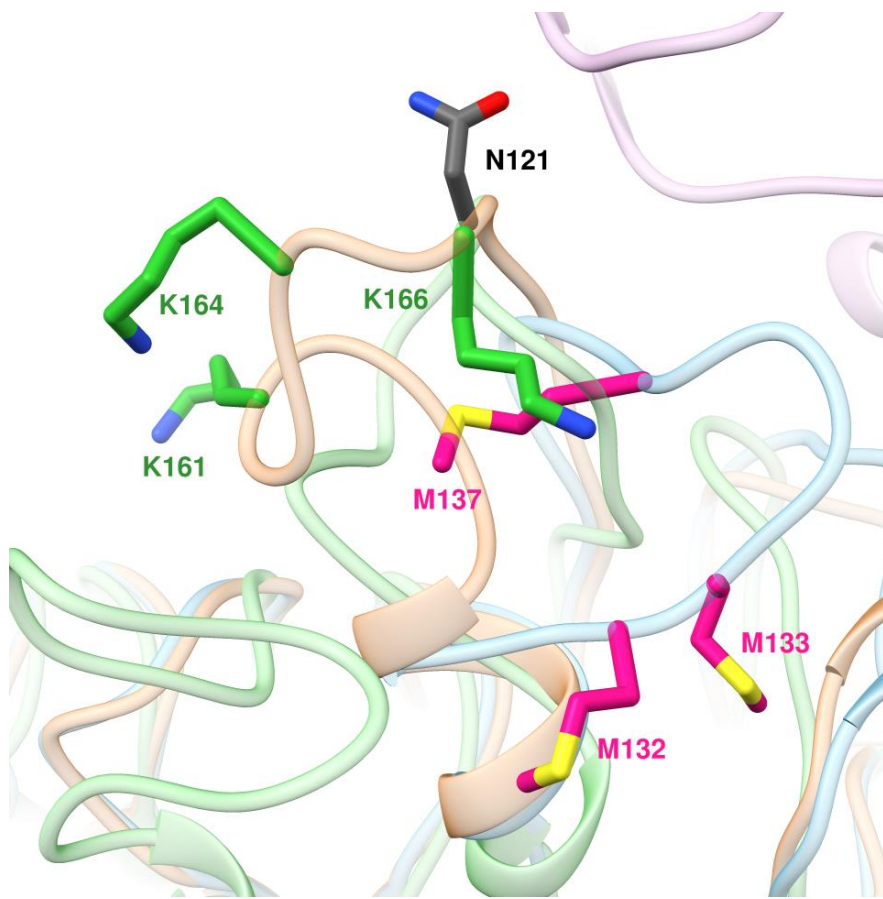

**Extended Data Fig 5. PGLR and ADPG2 N-terminal loops**

In PvPGIP2-FpPG1 interaction N-terminal loop with N121 play a key role in PG-PGIP interaction (FpPG1 aa in grey). In PGLR (blue) this loop is rich in methionine (pink) while ADPG2 loop (in brown) is rich in lysine (green) residues. PvPGIP2 is plum-colored.

**A**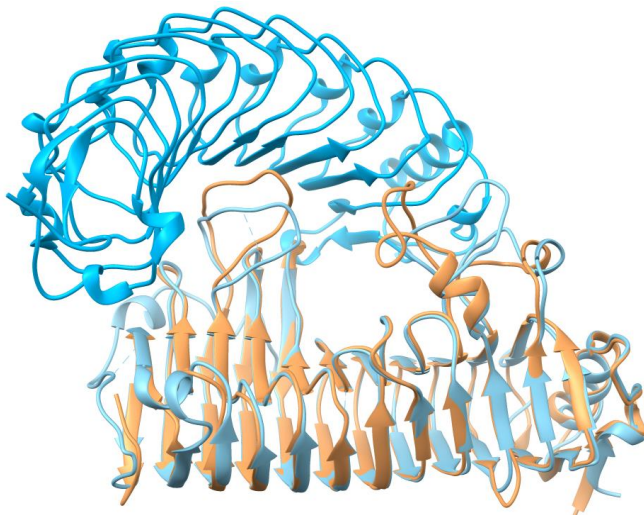**B**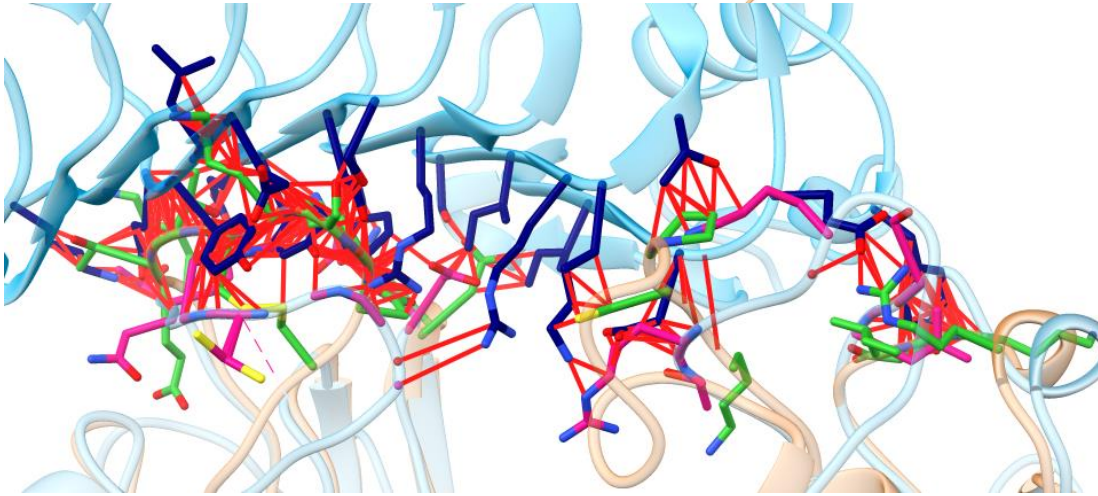

**Extended data Fig 6. Structural determinants of the absence of interaction between AtPGIP2 and PGLR-ADPG2**  
A) Ribbon representation of AtPGIP2 (dark blue) in interaction with PGLR (blue) and ADPG2 (brown). B) Interaction of AtPGIP2 with PGLR and ADPG2. The model of AtPGIP2 was superimposed onto PvPGIP2. Amino acids of AtPGIP2 (dark blue), PGLR (pink) and ADPG2 (green) included in clashes closer than 0.6 Å are shown. The red lines represent atoms overlap of minimum 0.6 Å.

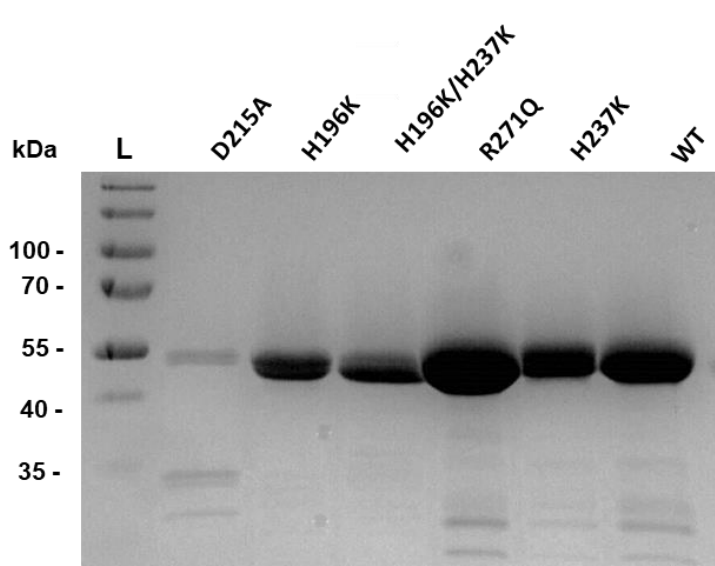

**Extended data Fig 7. SDS-PAGE representing the wild type and mutants of PGLR**

PGLR and its mutants were purified with His-tag using 1 mL Ni-NTA colon. Proteins were resolved on a 12% polyacrylamide gel and were stained by Coomassie blue. L-ladder.



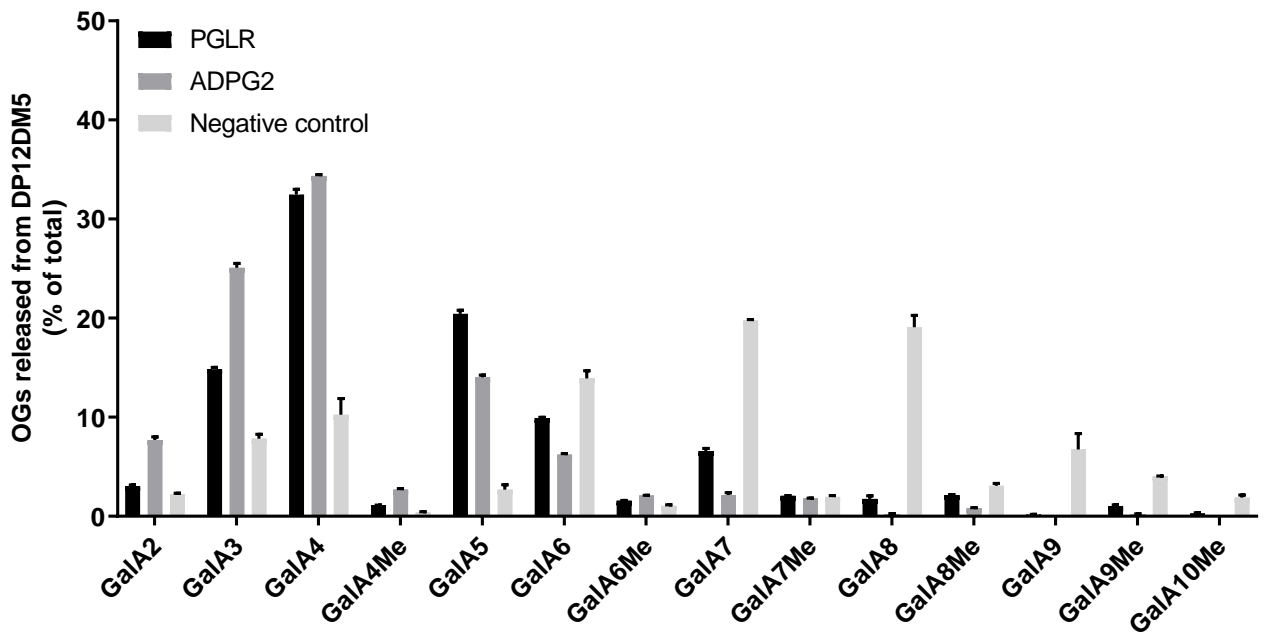

**Extended data Fig 8. Oligogalacturonides produced by PGLR and ADPG2 from pectins of DP12DM5**  
 Oligoprofiling of OGs after over-night digestion of DP12DM5 (degree of polymerization centered on 12 and degree of methylesterification centered on 5) pectins by PGLR and ADPG2 at 40°C, pH5. Negative control: undigested DP12DM5 pectins.

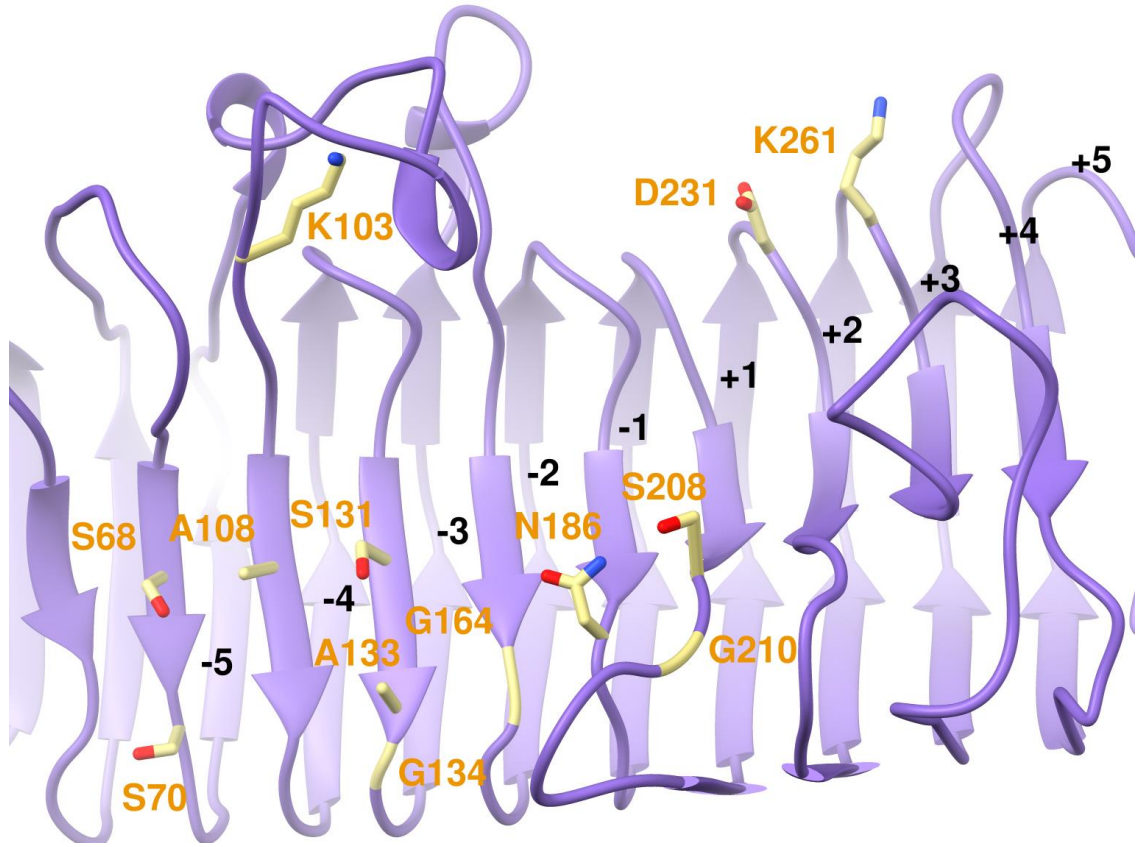

**Extended data Fig 9. Structure of subsites of AaPG1**

Structure of the -5/+5 subsites of AaPG1 (purple with khaki labelled aa).

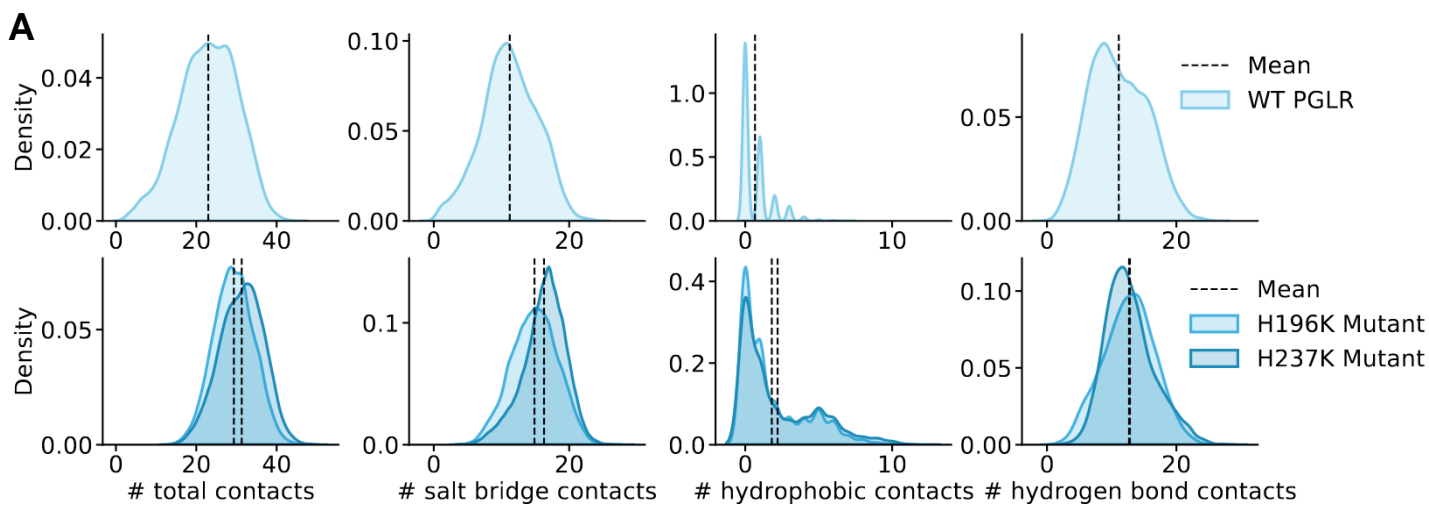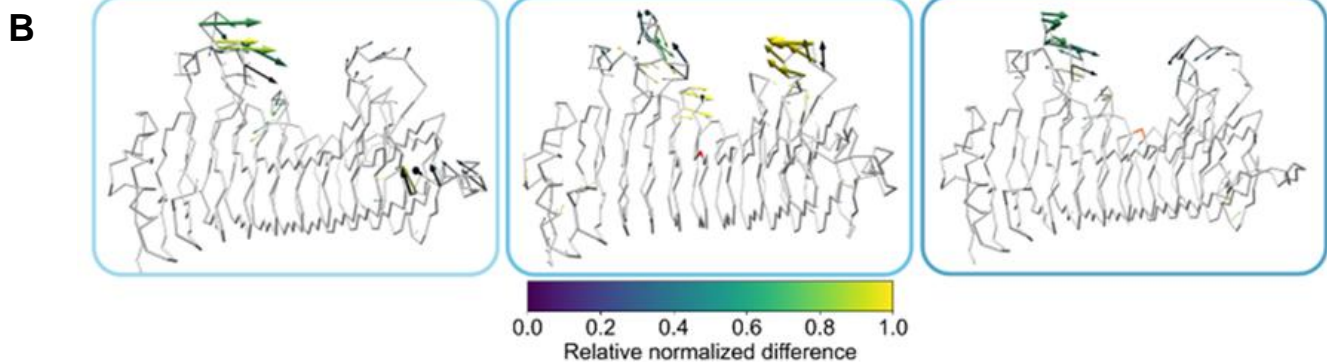

### Extended data Fig 10. PGLR H196K and H237K mutants contact calculations

A) Probability density distributions for the number of contacts that occur between WT PGLR (light blue), H196K (medium blue) and H237K mutants (dark blue) and their fully de-methylated deca-saccharides, within a cutoff of 4.0 Å. Black dashed lines indicate mean values. B) Normalized porcupine plots illustrating the largest motions of protein alpha-carbon atoms represented by the first eigenvector of a principal component analysis, for WT PGLR (light blue; left), H196K (medium blue; middle) and H237K (dark blue; right); complexed to fully de-methylated deca-saccharides (pattern 1). Arrows indicate direction and relative normalized magnitude of movement, from 0 (dark blue) to 1 (yellow).

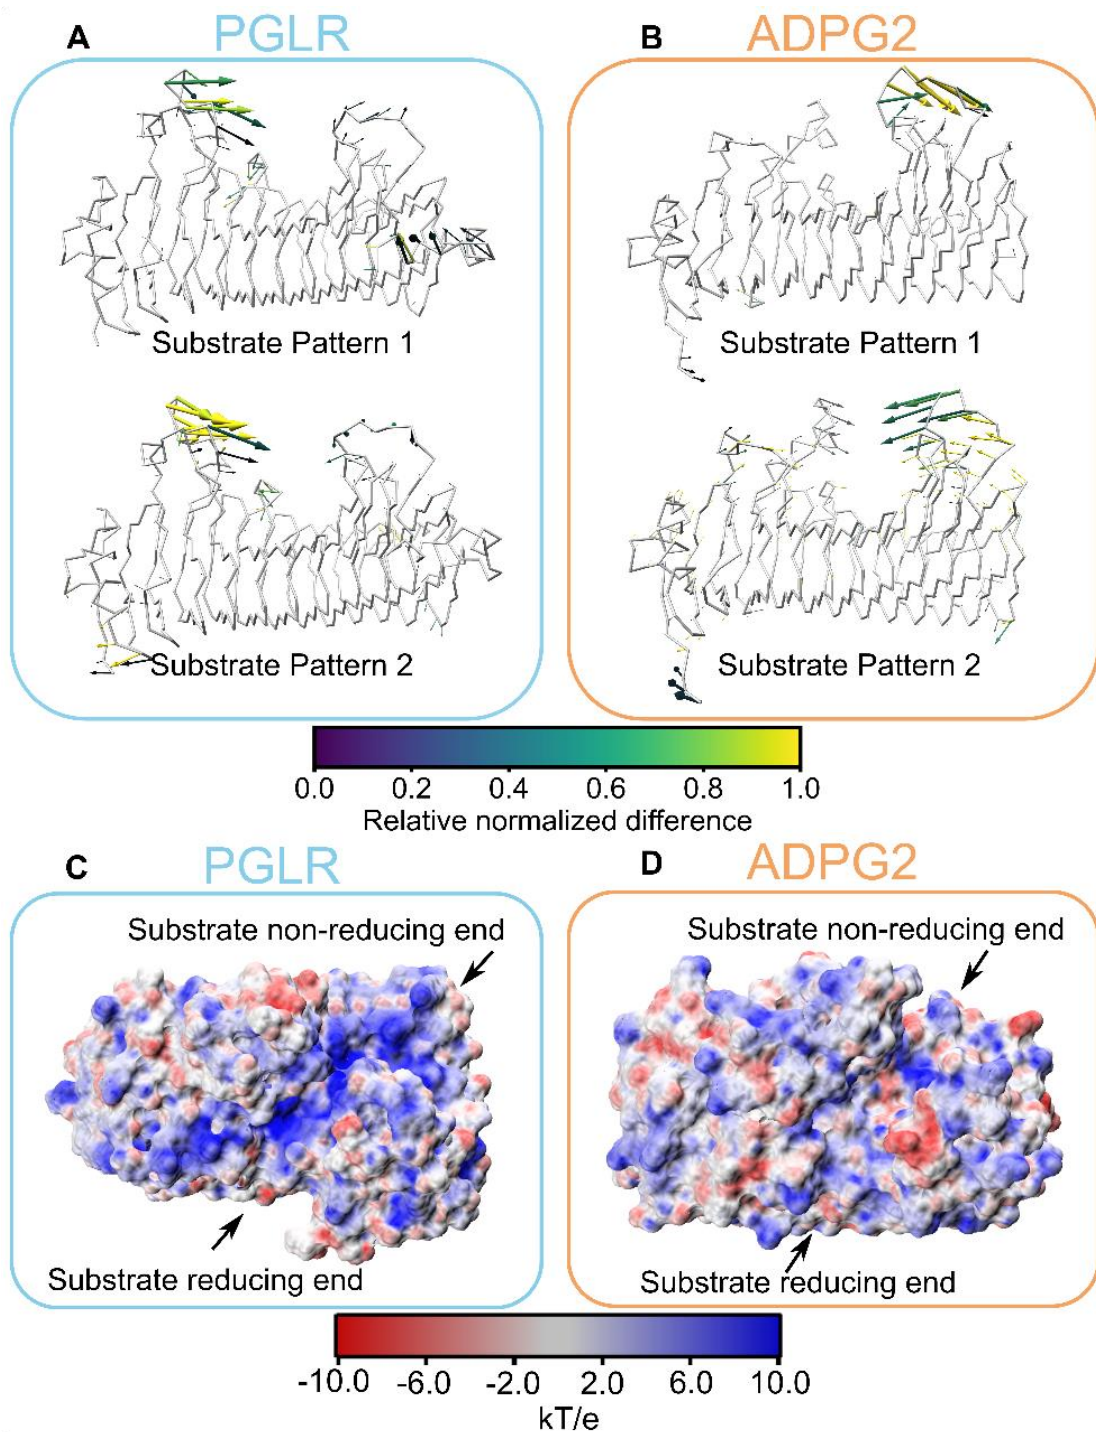

**Extended data Fig 11.**

A) Normalized porcupine plots illustrating the largest motions of protein alpha-carbon atoms represented by the first eigenvector of a principal component analysis, for WT PGLR with a fully demethylesterified decasaccharide (pattern 1) (top) and a 60% methylesterified decasaccharide (pattern 2, bottom). Arrows indicate direction and relative normalized magnitude of movement, from 0 (dark blue) to 1 (yellow). B) Normalized porcupine plots illustrating the largest motions of protein alpha-carbon atoms represented by the first eigenvector of a principal component analysis, for WT ADPG2 with a fully demethylesterified decasaccharide (pattern 1, top) and a 60% methylesterified decasaccharide (pattern 2, bottom). Arrows indicate direction and relative normalized magnitude of movement, from 0 (dark blue) to 1 (yellow). C) WT PGLR protein surface electrostatic potential projected on the protein's molecular surface, coloured from -10 kT/e (red) to 10 kT/e (blue). The non-reducing (subsites -5) and reducing (subsites +5) ends are labelled as appropriate. D) WT ADPG2 protein surface electrostatic potential projected on the protein's molecular surface, coloured from -10 kT/e (red) to 10 kT/e (blue). The non-reducing (subsites -5) and reducing (subsites +5) ends are labelled as appropriate.

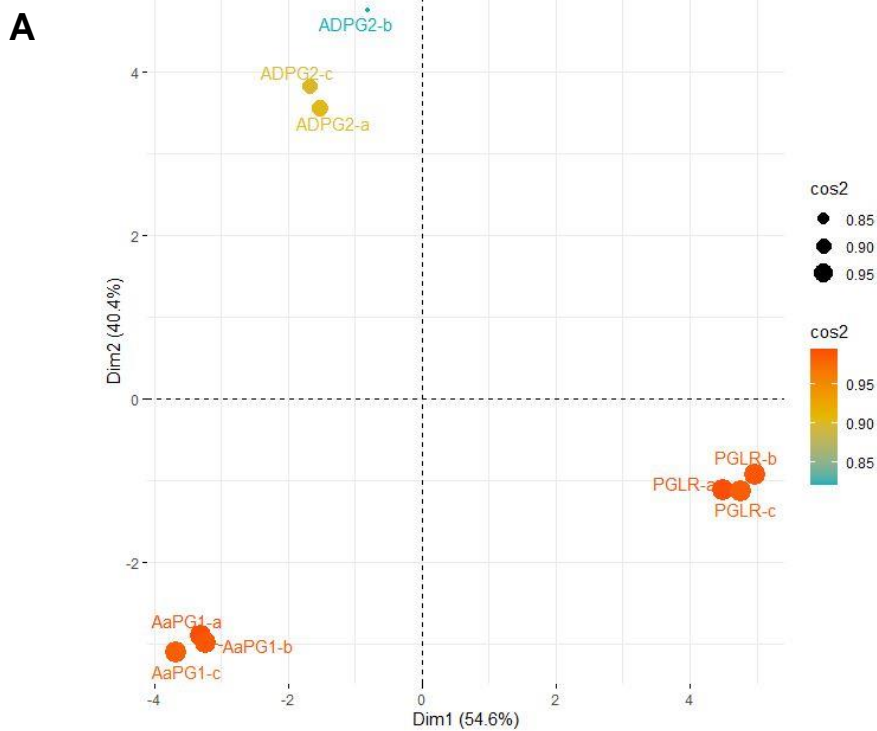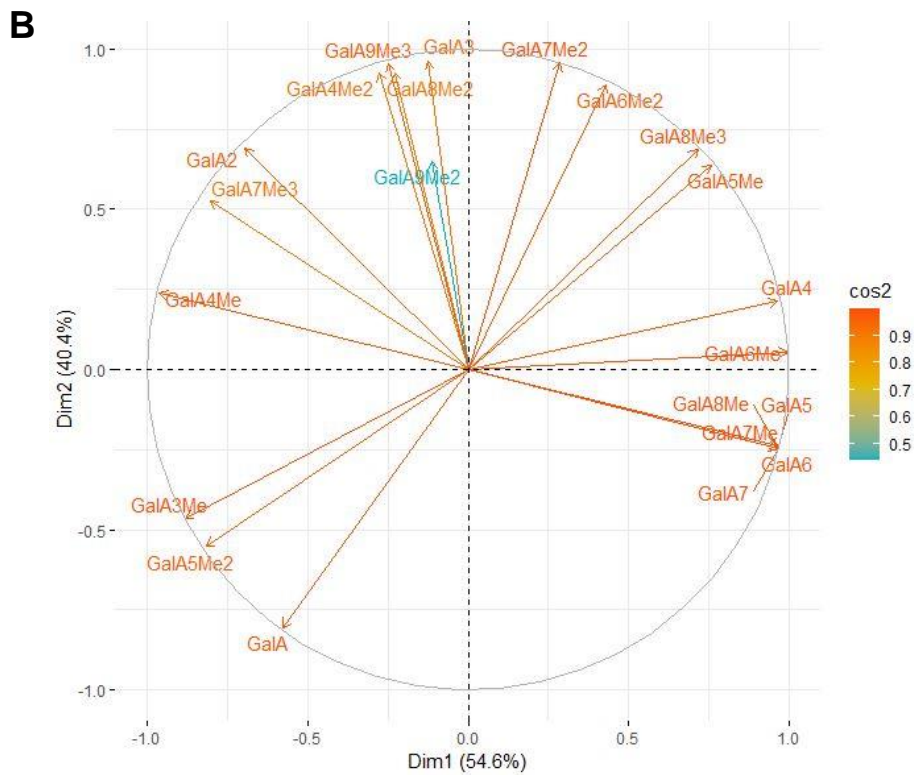

**Extended data Fig 12. PCA of OGs produced by PGLR, ADPG2 and AaPG1**

A) Score plot of Principal Component Analysis (PCA) of oligogalacturonides released from pectins DM 20-34% by PGLR, ADPG2 and AaPG1. a, b, c represent biological repetitions. B) Loading plot. The oligogalacturonides released after overnight digestions of pectins DM 20-34% by PGLR, ADPG2 and AaPG1 were analysed by PCA using R-package (FactoMineR and Factoextra).

| Enzyme        | Gene ID              | Forward 5'-3'                                          | Reverse 3'-5'                                  |
|---------------|----------------------|--------------------------------------------------------|------------------------------------------------|
| ADPG2         | At2g41850            | <u>TCTAAGAATTC</u> ACTCAAGAATCAGCCCTAATGTAT<br>ATGACCA | <u>TGCACGCGGCCGCA</u> AGTGGAGTTGCACTGAGG<br>CA |
| PGLR<br>D215A | At5g14650-<br>D215A  | GTTTGGATGGAAATGCA <b>AGC</b> GTCACCACAAGCC             | GGCTTGTGGTGAC <b>GCT</b> TGCATTCCATCCAAAC      |
| PGLR<br>H196K | At5g14650-<br>H196K* | CCTGGGAGTTTTGCA <b>ACC</b> TAATACCGTCAGTG              | CACTGACGGTATT <b>AAG</b> TTGCAAACTCCCAGG       |
| PGLR<br>H237K | At5g14650-<br>H237K* | CCAATGGAAATAC <b>CCC</b> TACCTGGACCACAATC              | GATTGTGGTCCAGGT <b>AAG</b> GGTATTTCCATTGG      |
| PGLR<br>R271Q | At5g14650-<br>R271Q  | CTTGCCAAGACTTGAT <b>CTG</b> GACACCGTTTGTAG             | CTACAAACGGTGT <b>CCAG</b> ATCAAGTCTTGCCAAG     |

\* At5g14650 H196K-H237K single and double mutants were made using these primers.

### Extended data Table 1. Primers for cloning mutated forms of PGLR and ADPG2 into pPICzαB expression vectors.

Table with primers used for the cloning of coding sequences into pPICzαB. Restriction enzymes sites for EcoRI, NotI are underlined, added bases are written in *italics*. Mutation bases are **bolded**.
